# Supplementary material for: The Impact of Information Technology on Patient Engagement and Health Behavior Change: A Systematic Review of the Literature
Source: PubMed Central journal article supplement (PMC4742621; doi:10.2196/medinform.4514), 2016-01-21
Supplement: medinform_v4i1e1_app1.pdf [file medinform_v4i1e1_app1.pdf]

| Study Name                              | Aims were clearly stated | Research design was appropriate | Recruitment strategy was appropriate | Theories were clearly stated | Usability tested within the study | Patients' engagement looked at within the study | Data collection method was appropriate | Data analysis sufficiently rigorous | Findings were clearly stated | Total Score | Scoring |
|-----------------------------------------|--------------------------|---------------------------------|--------------------------------------|------------------------------|-----------------------------------|-------------------------------------------------|----------------------------------------|-------------------------------------|------------------------------|-------------|---------|
| Adachi, Y (2007). Japan <sup>31</sup>   | ✓                        | ✓                               | ✓                                    | NR/Unclear                   | NR/Unclear                        | ✓                                               | ✓                                      | ✓                                   | ✓                            | 7           | 78%     |
| Agarwal, R (2013). USA <sup>84</sup>    | ✓                        | ✓                               | NR/Unclear                           | ✓                            | ✓                                 | ✓                                               | ✓                                      | ✓                                   | ✓                            | 8           | 89%     |
| Agricola, E (2014). Italy <sup>85</sup> | ✓                        | ✓                               | ✓                                    | NR/Unclear                   | ✓                                 | ✓                                               | ✓                                      | ✓                                   | ✓                            | 8           | 89%     |
| Aikens, JE (2014). USA <sup>177</sup>   | ✓                        | ✓                               | ✓                                    | NR/Unclear                   | NR/Unclear                        | ✓                                               | ✓                                      | ✓                                   | ✓                            | 7           | 78%     |
| Andrade, AS (2005). USA <sup>49</sup>   | ✓                        | ✓                               | ✓                                    | NR/Unclear                   | ✓                                 | ✓                                               | ✓                                      | ✓                                   | ✓                            | 8           | 89%     |



Norway<sup>69</sup>

|                                                 |   |   |            |            |            |            |   |   |   |   |     |
|-------------------------------------------------|---|---|------------|------------|------------|------------|---|---|---|---|-----|
| Buhrman, M (2004). Sweden <sup>114</sup>        | ✓ | ✓ | ✓          | ✓          | NR/Unclear | ✓          | ✓ | ✓ | ✓ | 8 | 89% |
| Buhrman, M (2013). Sweden <sup>89</sup>         | ✓ | ✓ | ✓          | NR/Unclear | ✓          | ✓          | ✓ | ✓ | ✓ | 8 | 89% |
| Chan, DS (2003). USA <sup>57</sup>              | ✓ | ✓ | ✓          | NR/Unclear | NR/Unclear | ✓          | ✓ | ✓ | ✓ | 7 | 78% |
| Chen, ZW (2008). China <sup>44</sup>            | ✓ | ✓ | ✓          | NR/Unclear | NR/Unclear | ✓          | ✓ | ✓ | ✓ | 7 | 78% |
| Cho, JH (2006). Korea <sup>138</sup>            | ✓ | ✓ | ✓          | NR/Unclear | NR/Unclear | ✓          | ✓ | ✓ | ✓ | 7 | 78% |
| Christensen, A (2010). Poland <sup>158</sup>    | ✓ | ✓ | ✓          | NR/Unclear | NR/Unclear | ✓          | ✓ | ✓ | ✓ | 7 | 78% |
| Christensen, H (2004). Australia <sup>115</sup> | ✓ | ✓ | ✓          | ✓          | NR/Unclear | NR/Unclear | ✓ | ✓ | ✓ | 7 | 78% |
| Claborn, KR (2014). USA <sup>81</sup>           | ✓ | ✓ | NR/Unclear | NR/Unclear | ✓          | ✓          | ✓ | ✓ | ✓ | 7 | 78% |
| Coyle, D (2009). UK <sup>55</sup>               | ✓ | ✓ | NR/Unclear | NR/Unclear | NR/Unclear | ✓          | ✓ | ✓ | ✓ | 6 | 67% |
| Danaher, BG (2006). USA <sup>40</sup>           | ✓ | ✓ | ✓          | ✓          | NR/Unclear | ✓          | ✓ | ✓ | ✓ | 8 | 89% |
| Delbanco, T (2012). USA <sup>200</sup>          | ✓ | ✓ | NR/Unclear | NR/Unclear | NR/Unclear | ✓          | ✓ | ✓ | ✓ | 6 | 67% |

|                                                        |   |   |            |            |            |            |   |   |   |   |      |
|--------------------------------------------------------|---|---|------------|------------|------------|------------|---|---|---|---|------|
| Downer, SR<br>(2005).<br>Australia <sup>160</sup>      | ✓ | ✓ | ✓          | NR/Unclear | NR/Unclear | ✓          | ✓ | ✓ | ✓ | 7 | 78%  |
| Espie, CA<br>(2012). UK <sup>152</sup>                 | ✓ | ✓ | ✓          | ✓          | NR/Unclear | ✓          | ✓ | ✓ | ✓ | 8 | 89%  |
| Farmer, T<br>(2014). UK <sup>161</sup>                 | ✓ | ✓ | NR/Unclear | NR/Unclear | NR/Unclear | ✓          | ✓ | ✓ | ✓ | 6 | 67%  |
| Feldman, PH<br>(2005). USA <sup>90</sup>               | ✓ | ✓ | ✓          | ✓          | ✓          | ✓          | ✓ | ✓ | ✓ | 9 | 100% |
| Fisher, J<br>(2012). USA <sup>110</sup>                | ✓ | ✓ | ✓          | NR/Unclear | ✓          | ✓          | ✓ | ✓ | ✓ | 8 | 89%  |
| Fonda, SJ<br>(2009). USA <sup>139</sup>                | ✓ | ✓ | ✓          | ✓          | NR/Unclear | NR/Unclear | ✓ | ✓ | ✓ | 7 | 78%  |
| Franklin, VL<br>(2008). UK <sup>51</sup>               | ✓ | ✓ | ✓          | ✓          | NR/Unclear | ✓          | ✓ | ✓ | ✓ | 8 | 89%  |
| Franklin, VL<br>(2006). UK <sup>65</sup>               | ✓ | ✓ | ✓          | ✓          | NR/Unclear | ✓          | ✓ | ✓ | ✓ | 8 | 89%  |
| Furber, GV<br>(2011).<br>Australia <sup>188</sup>      | ✓ | ✓ | ✓          | NR/Unclear | NR/Unclear | ✓          | ✓ | ✓ | ✓ | 7 | 78%  |
| Gabriele, JM<br>(2011). USA <sup>72</sup>              | ✓ | ✓ | ✓          | ✓          | NR/Unclear | ✓          | ✓ | ✓ | ✓ | 8 | 89%  |
| Galiano-<br>Castillo, N<br>(2014). Spain <sup>58</sup> | ✓ | ✓ | ✓          | NR/Unclear | NR/Unclear | ✓          | ✓ | ✓ | ✓ | 7 | 78%  |
| Ginsburg, O.<br>M (2014).<br>Bangladesh <sup>155</sup> | ✓ | ✓ | ✓          | ✓          | NR/Unclear | ✓          | ✓ | ✓ | ✓ | 8 | 89%  |

|                                         |   |   |            |            |            |            |   |   |   |   |      |
|-----------------------------------------|---|---|------------|------------|------------|------------|---|---|---|---|------|
| Glasgow, RE (2011). USA <sup>90</sup>   | √ | √ | √          | √          | √          | NR/Unclear | √ | √ | √ | 8 | 89%  |
| Glasgow, RE (2012). USA <sup>167</sup>  | √ | √ | √          | √          | NR/Unclear | √          | √ | √ | √ | 8 | 89%  |
| Glynn, SM (2010). USA <sup>91</sup>     | √ | √ | √          | √          | √          | √          | √ | √ | √ | 9 | 100% |
| Gold, J (2010). Australia <sup>71</sup> | √ | √ | NR/Unclear | √          | NR/Unclear | √          | √ | √ | √ | 7 | 78%  |
| Granholm, E (2012). USA <sup>67</sup>   | √ | √ | √          | √          | NR/Unclear | √          | √ | √ | √ | 8 | 89%  |
| Gray, JE (2000). USA <sup>59</sup>      | √ | √ | √          | NR/Unclear | NR/Unclear | √          | √ | √ | √ | 7 | 78%  |
| Green, BB (2008). USA <sup>77</sup>     | √ | √ | √          | √          | NR/Unclear | √          | √ | √ | √ | 8 | 89%  |
| Greene, JA (2011). USA <sup>111</sup>   | √ | √ | NR/Unclear | NR/Unclear | √          | √          | √ | √ | √ | 7 | 78%  |
| Greysen, SR (2014). USA <sup>189</sup>  | √ | √ | NR/Unclear | NR/Unclear | NR/Unclear | √          | √ | √ | √ | 6 | 67%  |
| Gustafson, DH (2001). USA <sup>74</sup> | √ | √ | √          | √          | NR/Unclear | √          | √ | √ | √ | 8 | 89%  |
| Gustafson, DH (2005). USA <sup>92</sup> | √ | √ | √          | √          | √          | √          | √ | √ | √ | 9 | 100% |
| Gutierrez, N                            | √ | √ | NR/Unclear | NR/Unclear | √          | NR/Unclear | √ | √ | √ | 6 | 67%  |

|                                                |   |   |            |            |            |            |   |   |   |   |  |     |
|------------------------------------------------|---|---|------------|------------|------------|------------|---|---|---|---|--|-----|
| (2014). USA <sup>83</sup>                      |   |   | ear        |            | r          |            |   |   |   |   |  |     |
| Habibović, M<br>(2014).                        | ✓ | ✓ | ✓          | NR/Unclear | ✓          | NR/Unclear | ✓ | ✓ | ✓ | 7 |  |     |
| Netherlands <sup>197</sup>                     |   |   |            |            |            |            |   |   |   |   |  | 78% |
| Harris, LT<br>(2010). USA <sup>107</sup>       | ✓ | ✓ | ✓          | NR/Unclear | ✓          | NR/Unclear | ✓ | ✓ | ✓ | 7 |  | 78% |
| Hasin, DS<br>(2014). USA <sup>93</sup>         | ✓ | ✓ | ✓          | NR/Unclear | ✓          | ✓          | ✓ | ✓ | ✓ | 8 |  | 89% |
| Heisler, M<br>(2014). USA <sup>168</sup>       | ✓ | ✓ | ✓          | ✓          | NR/Unclear | ✓          | ✓ | ✓ | ✓ | 8 |  | 89% |
| Helander, E<br>(2014). USA <sup>178</sup>      | ✓ | ✓ | ✓          | ✓          | NR/Unclear | NR/Unclear | ✓ | ✓ | ✓ | 7 |  | 78% |
| Herbst, N<br>(2014).<br>Germany <sup>116</sup> | ✓ | ✓ | ✓          | ✓          | NR/Unclear | ✓          | ✓ | ✓ | ✓ | 8 |  | 89% |
| Heyworth, L<br>(2014). USA <sup>169</sup>      | ✓ | ✓ | NR/Unclear | NR/Unclear | NR/Unclear | ✓          | ✓ | ✓ | ✓ | 6 |  | 67% |
| Holtz, B<br>(2014). USA <sup>179</sup>         | ✓ | ✓ | ✓          | NR/Unclear | NR/Unclear | ✓          | ✓ | ✓ | ✓ | 7 |  | 78% |
| Houston, TK<br>(2002). USA <sup>117</sup>      | ✓ | ✓ | ✓          | NR/Unclear | NR/Unclear | NR/Unclear | ✓ | ✓ | ✓ | 6 |  | 67% |
| Hunter, CM<br>(2008). USA <sup>180</sup>       | ✓ | ✓ | ✓          | NR/Unclear | NR/Unclear | ✓          | ✓ | ✓ | ✓ | 7 |  | 78% |
| Hurling, R<br>(2007). UK <sup>70</sup>         | ✓ | ✓ | ✓          | ✓          | NR/Unclear | ✓          | ✓ | ✓ | ✓ | 8 |  | 89% |
| Idriss, SZ<br>(2009). USA <sup>190</sup>       | ✓ | ✓ | ✓          | NR/Unclear | NR/Unclear | ✓          | ✓ | ✓ | ✓ | 7 |  | 78% |

|                                                       |   |   |   |            | r          |   |   |   |   |   |   |      |
|-------------------------------------------------------|---|---|---|------------|------------|---|---|---|---|---|---|------|
| Irvine, AB<br>(2013). USA <sup>94</sup>               | √ | √ | √ | √          | √          | √ | √ | √ | √ | √ | 9 | 100% |
| Iverson, SA<br>(2008). USA <sup>95</sup>              | √ | √ | √ | NR/Unclear | √          | √ | √ | √ | √ | √ | 8 | 89%  |
| Johnson, F<br>(2011). UK <sup>125</sup>               | √ | √ | √ | NR/Unclear | NR/Unclear | √ | √ | √ | √ | √ | 7 | 78%  |
| Johnston, JD<br>(2012). USA <sup>90</sup>             | √ | √ | √ | √          | NR/Unclear | √ | √ | √ | √ | √ | 8 | 89%  |
| Kaplan, K<br>(2011). USA <sup>45</sup>                | √ | √ | √ | √          | NR/Unclear | √ | √ | √ | √ | √ | 8 | 89%  |
| Kato, PM<br>(2008). USA <sup>75</sup>                 | √ | √ | √ | √          | NR/Unclear | √ | √ | √ | √ | √ | 8 | 89%  |
| Kay-Lambkin,<br>F (2011).<br>Australia <sup>162</sup> | √ | √ | √ | √          | NR/Unclear | √ | √ | √ | √ | √ | 8 | 89%  |
| Kerr, J (2008).<br>USA <sup>118</sup>                 | √ | √ | √ | √          | NR/Unclear | √ | √ | √ | √ | √ | 8 | 89%  |
| Keyserling,<br>TC (2014).<br>USA <sup>176</sup>       | √ | √ | √ | NR/Unclear | NR/Unclear | √ | √ | √ | √ | √ | 7 | 78%  |
| Kim, CJ<br>(2006). South<br>Korea <sup>181</sup>      | √ | √ | √ | NR/Unclear | NR/Unclear | √ | √ | √ | √ | √ | 7 | 78%  |
| Kim, HS<br>(2007). South<br>Korea <sup>137</sup>      | √ | √ | √ | √          | NR/Unclear | √ | √ | √ | √ | √ | 8 | 89%  |
| Kim, HS<br>(2008). South                              | √ | √ | √ | NR/Unclear | NR/Unclear | √ | √ | √ | √ | √ | 7 | 78%  |

|                                                                  |   |   |            |            |            |            |   |   |   |   |  |      |
|------------------------------------------------------------------|---|---|------------|------------|------------|------------|---|---|---|---|--|------|
| Korea <sup>199</sup>                                             |   |   |            |            | r          |            |   |   |   |   |  |      |
| Kim, SI<br>(2008). South<br>Korea <sup>140</sup>                 | ✓ | ✓ | ✓          | ✓          | NR/Unclear | ✓          | ✓ | ✓ | ✓ | 8 |  | 89%  |
| King, SN<br>(2012). USA <sup>36</sup>                            | ✓ | ✓ | ✓          | NR/Unclear | ✓          | ✓          | ✓ | ✓ | ✓ | 8 |  | 89%  |
| Kinney, AY<br>(2014). USA <sup>60</sup>                          | ✓ | ✓ | ✓          | NR/Unclear | ✓          | ✓          | ✓ | ✓ | ✓ | 8 |  | 89%  |
| Kiselev, AR<br>(2012).<br>Russia <sup>153</sup>                  | ✓ | ✓ | ✓          | NR/Unclear | NR/Unclear | ✓          | ✓ | ✓ | ✓ | 7 |  | 78%  |
| Kornman, K<br>PA (2010).<br>Australia <sup>126</sup>             | ✓ | ✓ | ✓          | NR/Unclear | NR/Unclear | ✓          | ✓ | ✓ | ✓ | 7 |  | 78%  |
| Krishna, S<br>(2003). USA <sup>96</sup>                          | ✓ | ✓ | ✓          | NR/Unclear | NR/Unclear | NR/Unclear | ✓ | ✓ | ✓ | 6 |  | 67%  |
| <a href="#">Zernicke, KA</a><br>(2014).<br>Canada <sup>156</sup> | ✓ | ✓ | ✓          | ✓          | ✓          | ✓          | ✓ | ✓ | ✓ | 9 |  | 100% |
| Schweier, R<br>(2014).<br>Germany <sup>196</sup>                 | ✓ | ✓ | ✓          | NR/Unclear | ✓          | ✓          | ✓ | ✓ | ✓ | 8 |  | 89%  |
| Kulkarni, A<br>(2014).<br>Canada <sup>175</sup>                  | ✓ | ✓ | NR/Unclear | NR/Unclear | NR/Unclear | ✓          | ✓ | ✓ | ✓ | 6 |  | 67%  |
| Kwon, HS<br>(2004).<br>Korea <sup>39</sup>                       | ✓ | ✓ | ✓          | NR/Unclear | NR/Unclear | ✓          | ✓ | ✓ | ✓ | 7 |  | 78%  |
| Jelsma, D<br>(2014).                                             | ✓ | ✓ | ✓          | NR/Unclear | NR/Unclear | ✓          | ✓ | ✓ | ✓ | 7 |  | 78%  |



|                                                |   |   |            |            |            |            |   |   |   |   |   |      |
|------------------------------------------------|---|---|------------|------------|------------|------------|---|---|---|---|---|------|
| Netherland <sup>56</sup>                       |   |   |            |            | r          |            |   |   |   |   |   |      |
| Lancioni, GE<br>(2012). Italy <sup>191</sup>   | √ | √ | √          | √          | √          | √          | √ | √ | √ | √ | 9 | 100% |
| Lee, CJ<br>(2010). USA <sup>97</sup>           | √ | √ | √          | √          | NR/Unclear | √          | √ | √ | √ | √ | 8 | 89%  |
| Lee, TI (2007).<br>Taiwan <sup>185</sup>       | √ | √ | √          | NR/Unclear | NR/Unclear | √          | √ | √ | √ | √ | 7 | 78%  |
| Lester, RT<br>(2010).<br>Kenya <sup>192</sup>  | √ | √ | √          | NR/Unclear | √          | √          | √ | √ | √ | √ | 8 | 89%  |
| Lewis, N<br>(2009). USA <sup>98</sup>          | √ | √ | √          | NR/Unclear | NR/Unclear | √          | √ | √ | √ | √ | 7 | 78%  |
| Liew, SM<br>(2009).<br>Malaysia <sup>163</sup> | √ | √ | √          | √          | √          | NR/Unclear | √ | √ | √ | √ | 8 | 89%  |
| Lorig, KR<br>(2006). USA <sup>99</sup>         | √ | √ | √          | √          | √          | √          | √ | √ | √ | √ | 9 | 100% |
| Magnezi, R<br>(2014). Israel <sup>52</sup>     | √ | √ | √          | NR/Unclear | NR/Unclear | √          | √ | √ | √ | √ | 7 | 78%  |
| McCann, L<br>(2009). UK <sup>157</sup>         | √ | √ | √          | √          | NR/Unclear | NR/Unclear | √ | √ | √ | √ | 7 | 78%  |
| McCarrier,<br>KP (2009).<br>USA <sup>141</sup> | √ | √ | √          | √          | NR/Unclear | NR/Unclear | √ | √ | √ | √ | 7 | 78%  |
| McInnes, DK<br>(2013). USA <sup>198</sup>      | √ | √ | NR/Unclear | NR/Unclear | NR/Unclear | √          | √ | √ | √ | √ | 6 | 67%  |
| McInnes, DK<br>(2014). USA <sup>164</sup>      | √ | √ | √          | NR/Unclear | NR/Unclear | √          | √ | √ | √ | √ | 7 | 78%  |

|                                                      |   |   |            |            | r          |            |   |   |   |   |   |      |
|------------------------------------------------------|---|---|------------|------------|------------|------------|---|---|---|---|---|------|
| McKay, HG<br>(2008). USA <sup>133</sup>              | √ | √ | √          | √          | √          | √          | √ | √ | √ | √ | 9 | 100% |
| McKay, HG<br>(2002). USA <sup>53</sup>               | √ | √ | √          | √          | √          | NR/Unclear | √ | √ | √ | √ | 8 | 89%  |
| McKay, HG<br>(2001). USA <sup>54</sup>               | √ | √ | √          | √          | NR/Unclear | √          | √ | √ | √ | √ | 8 | 89%  |
| McMahon, G<br>(2005). USA <sup>143</sup>             | √ | √ | √          | √          | NR/Unclear | √          | √ | √ | √ | √ | 8 | 89%  |
| Meglic, M<br>(2010).<br>Slovenia <sup>170</sup>      | √ | √ | √          | NR/Unclear | NR/Unclear | √          | √ | √ | √ | √ | 7 | 78%  |
| Meigs, JB<br>(2003). USA <sup>144</sup>              | √ | √ | √          | NR/Unclear | √          | √          | √ | √ | √ | √ | 8 | 89%  |
| Meiland, FJM<br>(2014).<br>Netherlands <sup>61</sup> | √ | √ | √          | √          | NR/Unclear | √          | √ | √ | √ | √ | 8 | 89%  |
| Napolitano,<br>MA (2003).<br>Australia <sup>32</sup> | √ | √ | √          | √          | NR/Unclear | √          | √ | √ | √ | √ | 8 | 89%  |
| Nguyen, HQ<br>(2008). USA <sup>122</sup>             | √ | √ | √          | √          | √          | √          | √ | √ | √ | √ | 9 | 100% |
| Oh, E (2009).<br>Australia <sup>159</sup>            | √ | √ | NR/Unclear | √          | √          | √          | √ | √ | √ | √ | 8 | 89%  |
| Osborn, CY<br>(2013). USA <sup>100</sup>             | √ | √ | √          | NR/Unclear | NR/Unclear | √          | √ | √ | √ | √ | 7 | 78%  |
| Ostojic, V                                           | √ | √ | √          | NR/Unclear | NR/Unclear | √          | √ | √ | √ | √ | 7 | 78%  |

(2005). USA<sup>123</sup>

|                                                       |   |   |   |            |            |            |   |   |   |   |     |
|-------------------------------------------------------|---|---|---|------------|------------|------------|---|---|---|---|-----|
| Park, MJ<br>(2012). South<br>Korea <sup>127</sup>     | ✓ | ✓ | ✓ | NR/Unclear | NR/Unclear | ✓          | ✓ | ✓ | ✓ | 7 | 78% |
| Park, MJ<br>(2009). South<br>Korea <sup>154</sup>     | ✓ | ✓ | ✓ | ✓          | NR/Unclear | NR/Unclear | ✓ | ✓ | ✓ | 7 | 78% |
| Parr, JM<br>(2011).<br>Australia <sup>171</sup>       | ✓ | ✓ | ✓ | NR/Unclear | NR/Unclear | ✓          | ✓ | ✓ | ✓ | 7 | 78% |
| Patrick, K<br>(2009). USA <sup>128</sup>              | ✓ | ✓ | ✓ | ✓          | NR/Unclear | ✓          | ✓ | ✓ | ✓ | 8 | 89% |
| Petersen, R<br>(2008). USA <sup>129</sup>             | ✓ | ✓ | ✓ | NR/Unclear | NR/Unclear | NR/Unclear | ✓ | ✓ | ✓ | 6 | 67% |
| Phillips, JH<br>(2014).<br>Australia <sup>195</sup>   | ✓ | ✓ | ✓ | ✓          | NR/Unclear | ✓          | ✓ | ✓ | ✓ | 8 | 89% |
| Plotnikoff, RC<br>(2005).<br>Canada <sup>182</sup>    | ✓ | ✓ | ✓ | NR/Unclear | NR/Unclear | ✓          | ✓ | ✓ | ✓ | 7 | 78% |
| Price, M<br>(2014). USA <sup>62</sup>                 | ✓ | ✓ | ✓ | ✓          | NR/Unclear | ✓          | ✓ | ✓ | ✓ | 8 | 89% |
| Quinn, CC<br>(2008). USA <sup>145</sup>               | ✓ | ✓ | ✓ | ✓          | NR/Unclear | ✓          | ✓ | ✓ | ✓ | 8 | 89% |
| Ralston, JD<br>(2009). USA <sup>146</sup>             | ✓ | ✓ | ✓ | NR/Unclear | NR/Unclear | ✓          | ✓ | ✓ | ✓ | 7 | 78% |
| Ramaekers,<br>BL (2009).<br>Netherlands <sup>48</sup> | ✓ | ✓ | ✓ | NR/Unclear | NR/Unclear | NR/Unclear | ✓ | ✓ | ✓ | 6 | 67% |

|                                                |   |   |            |            |            |            |   |   |   |   |      |
|------------------------------------------------|---|---|------------|------------|------------|------------|---|---|---|---|------|
| Rami, B (2006). Australia <sup>142</sup>       | ✓ | ✓ | ✓          | ✓          | NR/Unclear | ✓          | ✓ | ✓ | ✓ | 8 | 89%  |
| Read, E (2014). Canada <sup>78</sup>           | ✓ | ✓ | ✓          | ✓          | NR/Unclear | ✓          | ✓ | ✓ | ✓ | 8 | 89%  |
| Reback, CJ (2012). USA <sup>79</sup>           | ✓ | ✓ | ✓          | NR/Unclear | NR/Unclear | NR/Unclear | ✓ | ✓ | ✓ | 6 | 67%  |
| Richardson, A (2013). USA <sup>135</sup>       | ✓ | ✓ | ✓          | ✓          | NR/Unclear | NR/Unclear | ✓ | ✓ | ✓ | 7 | 78%  |
| Rodgers, A (2005). New Zealand <sup>68</sup>   | ✓ | ✓ | NR/Unclear | NR/Unclear | ✓          | NR/Unclear | ✓ | ✓ | ✓ | 6 | 67%  |
| Rooke, SE (2014). Australia <sup>101</sup>     | ✓ | ✓ | ✓          | ✓          | ✓          | NR/Unclear | ✓ | ✓ | ✓ | 8 | 89%  |
| Ross, SE (2004). USA <sup>102</sup>            | ✓ | ✓ | ✓          | ✓          | NR/Unclear | ✓          | ✓ | ✓ | ✓ | 8 | 89%  |
| Rotondi, A (2010). USA <sup>119</sup>          | ✓ | ✓ | ✓          | NR/Unclear | NR/Unclear | ✓          | ✓ | ✓ | ✓ | 7 | 78%  |
| Roy, H (2008). UK <sup>120</sup>               | ✓ | ✓ | ✓          | NR/Unclear | NR/Unclear | ✓          | ✓ | ✓ | ✓ | 7 | 78%  |
| Santschi, V (2007). Switzerland <sup>172</sup> | ✓ | ✓ | ✓          | NR/Unclear | NR/Unclear | ✓          | ✓ | ✓ | ✓ | 7 | 78%  |
| Scherr, D (2009). Austria <sup>38</sup>        | ✓ | ✓ | ✓          | NR/Unclear | NR/Unclear | ✓          | ✓ | ✓ | ✓ | 7 | 78%  |
| Schnall, R                                     | ✓ | ✓ | ✓          | ✓          | ✓          | ✓          | ✓ | ✓ | ✓ | 9 | 100% |

(2014). USA<sup>187</sup>

|                                           |   |   |            |            |            |            |   |   |   |   |   |      |
|-------------------------------------------|---|---|------------|------------|------------|------------|---|---|---|---|---|------|
| Sciamanna, CN (2006). USA <sup>186</sup>  | ✓ | ✓ | ✓          | ✓          | ✓          | ✓          | ✓ | ✓ | ✓ | ✓ | 9 | 100% |
| Shaw, LH (2002). USA <sup>50</sup>        | ✓ | ✓ | ✓          | NR/Unclear | NR/Unclear | ✓          | ✓ | ✓ | ✓ | ✓ | 7 | 78%  |
| Shrier, LA (2014). USA <sup>109</sup>     | ✓ | ✓ | ✓          | ✓          | ✓          | ✓          | ✓ | ✓ | ✓ | ✓ | 9 | 100% |
| Simon, GE (2011). USA <sup>73</sup>       | ✓ | ✓ | ✓          | ✓          | NR/Unclear | ✓          | ✓ | ✓ | ✓ | ✓ | 8 | 89%  |
| Sims, H (2012). UK <sup>165</sup>         | ✓ | ✓ | ✓          | NR/Unclear | NR/Unclear | ✓          | ✓ | ✓ | ✓ | ✓ | 7 | 78%  |
| Smith, KE (2004). USA <sup>148</sup>      | ✓ | ✓ | ✓          | NR/Unclear | NR/Unclear | ✓          | ✓ | ✓ | ✓ | ✓ | 7 | 78%  |
| Song, H (2013). USA <sup>42</sup>         | ✓ | ✓ | ✓          | ✓          | ✓          | ✓          | ✓ | ✓ | ✓ | ✓ | 9 | 100% |
| Španiel, F (2008). UK <sup>63</sup>       | ✓ | ✓ | ✓          | NR/Unclear | NR/Unclear | ✓          | ✓ | ✓ | ✓ | ✓ | 7 | 78%  |
| Stacy, JN (2009). USA <sup>66</sup>       | ✓ | ✓ | ✓          | ✓          | NR/Unclear | ✓          | ✓ | ✓ | ✓ | ✓ | 8 | 89%  |
| Steele, R (2007). Australia <sup>41</sup> | ✓ | ✓ | NR/Unclear | ✓          | ✓          | NR/Unclear | ✓ | ✓ | ✓ | ✓ | 7 | 78%  |
| Steinberg, DM (2014). USA <sup>130</sup>  | ✓ | ✓ | ✓          | ✓          | NR/Unclear | ✓          | ✓ | ✓ | ✓ | ✓ | 8 | 89%  |
| Stockwell, MS                             | ✓ | ✓ | ✓          | NR/Unclear | NR/Unclear | ✓          | ✓ | ✓ | ✓ | ✓ | 7 | 78%  |



|                                                     |   |   |   |            |            |            |   |   |   |   |      |
|-----------------------------------------------------|---|---|---|------------|------------|------------|---|---|---|---|------|
| Canada <sup>103</sup>                               |   |   |   |            |            |            |   |   |   |   |      |
| van den Berg, MH (2007). Netherlands <sup>104</sup> | ✓ | ✓ | ✓ | ✓          | ✓          | ✓          | ✓ | ✓ | ✓ | 9 | 100% |
| van der Vaart, R (2014). Netherlands <sup>174</sup> | ✓ | ✓ | ✓ | ✓          | ✓          | ✓          | ✓ | ✓ | ✓ | 9 | 100% |
| Vilella, A (2004). Spain <sup>173</sup>             | ✓ | ✓ | ✓ | NR/Unclear | NR/Unclear | ✓          | ✓ | ✓ | ✓ | 7 | 78%  |
| Villegas, N (2014). Chile <sup>105</sup>            | ✓ | ✓ | ✓ | ✓          | ✓          | ✓          | ✓ | ✓ | ✓ | 9 | 100% |
| Wakefield, BJ (2008). USA <sup>47</sup>             | ✓ | ✓ | ✓ | NR/Unclear | NR/Unclear | NR/Unclear | ✓ | ✓ | ✓ | 6 | 67%  |
| Ware, LJ (2008). UK <sup>132</sup>                  | ✓ | ✓ | ✓ | ✓          | NR/Unclear | ✓          | ✓ | ✓ | ✓ | 8 | 89%  |
| Weppner, WG (2010). USA <sup>150</sup>              | ✓ | ✓ | ✓ | NR/Unclear | NR/Unclear | ✓          | ✓ | ✓ | ✓ | 7 | 78%  |
| Williamson, DA (2006). USA <sup>194</sup>           | ✓ | ✓ | ✓ | ✓          | ✓          | NR/Unclear | ✓ | ✓ | ✓ | 8 | 89%  |
| Winstead-Derlega, C (2012). USA <sup>35</sup>       | ✓ | ✓ | ✓ | NR/Unclear | ✓          | NR/Unclear | ✓ | ✓ | ✓ | 7 | 78%  |
| Winzelberg, AJ (2000). USA <sup>106</sup>           | ✓ | ✓ | ✓ | ✓          | ✓          | ✓          | ✓ | ✓ | ✓ | 9 | 100% |
| Womble, LG (2004). USA <sup>193</sup>               | ✓ | ✓ | ✓ | NR/Unclear | ✓          | NR/Unclear | ✓ | ✓ | ✓ | 7 | 78%  |

|                                             |   |   |   |            |            |   |   |   |   |   |
|---------------------------------------------|---|---|---|------------|------------|---|---|---|---|---|
| Yoon, KH<br>(2008).<br>Korea <sup>151</sup> | √ | √ | √ | NR/Unclear | NR/Unclear | √ | √ | √ | √ | 7 |
|---------------------------------------------|---|---|---|------------|------------|---|---|---|---|---|

78%

√=Yes, NR=Not recorded.
