# Supplementary material for: The Impact of Information Technology on Patient Engagement and Health Behavior Change: A Systematic Review of the Literature
Source: PubMed Central journal article supplement (PMC4742621; doi:10.2196/medinform.4514), 2016-01-21
Supplement: medinform_v4i1e1_app2.pdf [file medinform_v4i1e1_app2.pdf]

| First Author                            | Disorders                          | Study Design     | Size | Technology | Time | Metric                                                                        | Method   | Clinical Outcome                                                                             | Impact <sup>[b]</sup> | Theory <sup>[a]</sup> | Usability Assessment | Usability | Engagement <sup>[c]</sup> |
|-----------------------------------------|------------------------------------|------------------|------|------------|------|-------------------------------------------------------------------------------|----------|----------------------------------------------------------------------------------------------|-----------------------|-----------------------|----------------------|-----------|---------------------------|
| Adachi, Y (2007). Japan <sup>31</sup>   | Nutrition and metabolism disorders | RCT              | 205  | Internet   | 7 m  | Body weight, BMI, daily eating, exercise, and sleeping habits                 | Direct   | Significant weight loss                                                                      | Yes                   | No                    | No                   |           | Yes                       |
| Agarwal, R (2013). USA <sup>84</sup>    | NS                                 | Cross-section    | 283  | Internet   | 3 m  | Knowledge, skill, and self-management                                         | Indirect | Significant (p<.05)                                                                          | Yes                   | 4                     | Yes                  | Usable    | Yes                       |
| Agricola, E (2014). Italy <sup>85</sup> | Women's health issues              | Cohort           | 508  | Internet   | 6 m  | Knowledge, and behaviors associated with risks for adverse pregnancy outcomes | Indirect | Decrease in alcohol consumption, folic acid and increase knowledge (-46.5% & -23.4% & 20.9%) | Yes                   | No                    | Yes                  | Usable    | Yes                       |
| Aikens, JE (2014). USA <sup>177</sup>   | Hormonal disorders                 | Quasi-experiment | 422  | Internet   | 9 m  | Depression, medication adherence, health literacy,                            | Indirect | Significant                                                                                  | Yes                   | No                    | No                   |           | Yes                       |

|                                        |                           |               |     |                     |     |                                                                                                                                                                    |          |                                                                                                                                                         |     |    |     |           |     |  |
|----------------------------------------|---------------------------|---------------|-----|---------------------|-----|--------------------------------------------------------------------------------------------------------------------------------------------------------------------|----------|---------------------------------------------------------------------------------------------------------------------------------------------------------|-----|----|-----|-----------|-----|--|
|                                        |                           |               |     |                     |     | abnormal glycaemia, and blood pressure                                                                                                                             |          |                                                                                                                                                         |     |    |     |           |     |  |
| Andrade, AS (2005). USA <sup>49</sup>  | Immune disorders          | RCT           | 58  | Electronic reminder | 6 m | Adherence rate                                                                                                                                                     | Indirect | Significant (P=001)                                                                                                                                     | Yes | No | Yes | Usable    | Yes |  |
| Arora, S (2014). USA <sup>33</sup>     | Hormonal disorders        | RCT           | 128 | Mobile              | 6 m | HbA1C, medication adherence, self-efficacy, performance of self-care tasks, quality of life, diabetes-specific knowledge, ED utilization, and patient satisfaction | Indirect | HbA1C level decreased by 1.05% vs 0.60%, medication adherence improved from 4.5 to 5.4 vs -0.1, and decreased in emergency services used 35.9% vs 51.6% | No  | 4  | Yes | Usable    | Yes |  |
| Baptist, AP (2011). USA <sup>121</sup> | Lung and airway disorders | Cross-section | 145 | Social network      | NS  | Usability                                                                                                                                                          | Indirect | Appropriate                                                                                                                                             | Yes | No | Yes | No usable | Yes |  |
| Bantum, EOC                            | Cancer                    | RCT           | 352 | Internet            | 6 m | Fatigue, insomnia,                                                                                                                                                 | Indirect | Significant                                                                                                                                             | Yes | No | Yes | Usable    | Yes |  |

|                                                 |                                    |     |     |                |      |                                                               |          |                                                                                                                                     |     |    |     |        |     |  |
|-------------------------------------------------|------------------------------------|-----|-----|----------------|------|---------------------------------------------------------------|----------|-------------------------------------------------------------------------------------------------------------------------------------|-----|----|-----|--------|-----|--|
| (2014).<br>USA <sup>82</sup>                    |                                    |     |     |                |      | exercise, fruit<br>and vegetable<br>intake, and<br>depression |          | reduction<br>s in<br>insomnia<br>and<br>increases<br>in<br>vigorous<br>exercise<br>and<br>stretchin<br>g                            |     |    |     |        |     |  |
| Barnabei,<br>VM (2008).<br>USA <sup>86</sup>    | Women's<br>health<br>issues        | RCT | 305 | Internet       | NS   | Patient-<br>provider<br>relationship                          | Indirect | Significa<br>nt<br>(p<0.05)                                                                                                         | Yes | No | Yes | Usable | Yes |  |
| Bell, AM<br>(2012).<br>USA <sup>147</sup>       | Hormon<br>al<br>disorders          | RCT | 65  | Mobile         | 12 m | HbA1c and<br>SMBG                                             | Direct   | Significa<br>nt decline<br>in HbA1c.                                                                                                | Yes | No | No  |        | Yes |  |
| Benhamou,<br>PY (2007).<br>France <sup>43</sup> | Hormon<br>al<br>disorders          | RCT | 30  | Mobile         | 12 m | HbA1c level                                                   | Direct   | Not<br>significan<br>t: HbA1c<br>(-0.25 ±<br>0.94%,<br>P<0.10)<br>and mean<br>glucose<br>values (-<br>9.2 ± 25<br>mg/dl,<br>P=0.06) | No  | No | Yes | Usable | Yes |  |
| Bingham,<br>PM. (2012).<br>USA <sup>76</sup>    | Lung<br>and<br>airway<br>disorders | RCT | 13  | Video-<br>game | 1 m  | Pulmonary<br>function                                         | Direct   | Improve<br>ment in<br>Pulmonar<br>y function<br>(PFTs)                                                                              | Yes | 5  | No  |        | Yes |  |

|                                               |                    |               |      |                |      |                                                                |          |                                                                                             |     |    |     |        |     |
|-----------------------------------------------|--------------------|---------------|------|----------------|------|----------------------------------------------------------------|----------|---------------------------------------------------------------------------------------------|-----|----|-----|--------|-----|
| Boland, MV (2014). USA <sup>112</sup>         | Eye disorders      | RCT           | 491  | Telemonitoring | 3 m  | Medication adherence                                           | Indirect | Adherence rate increased from 54% to 73% ( $P < .05$ )                                      | Yes | No | Yes | Usable | Yes |
| Bond, GE (2010). USA <sup>113</sup>           | Hormonal disorders | RCT           | 62   | Internet       | 6 m  | Quality of life, depression, social support, and self-efficacy | Indirect | Significant: $F(4.48)$ , $P = .007$                                                         | Yes | No | No  |        | Yes |
| Botts, NE (2011). USA <sup>87</sup>           | NS                 | Cross-section | 115  | Internet       | NS   | Usability                                                      | Indirect | Usability (74%), and frequently use (73%), belief in being responsible for their own health | Yes | No | Yes | Usable | Yes |
| Boudreaux, ED (2012). USA <sup>88</sup>       | Health hazard      | Cohort        | 70   | Internet       | 1 m  | Acceptability, satisfaction, and abstinence                    | Indirect | Mean patient satisfaction = 4.48                                                            | Yes | 3  | Yes | Usable | Yes |
| Bramley, D (2005). New Zealand <sup>134</sup> | Health hazard      | RCT           | 1705 | Mobile         | 26 w | Quit rate                                                      | Indirect | Quit rate 26.1% vs. 11.2%                                                                   | Yes | No | No  |        | Yes |
| Brendryen,                                    | Health             | RCT           | 396  | Mobile         | 12 m | Abstinence                                                     | Indirect | Significant                                                                                 | Yes | 4  | Yes | Usable | Yes |

|                                                |                                                     |     |    |          |     |                                                                                                                                                                                                          |          |                                                                                                                                            |     |    |     |        |     |
|------------------------------------------------|-----------------------------------------------------|-----|----|----------|-----|----------------------------------------------------------------------------------------------------------------------------------------------------------------------------------------------------------|----------|--------------------------------------------------------------------------------------------------------------------------------------------|-----|----|-----|--------|-----|
| H (2008).<br>Norway <sup>69</sup>              | hazard                                              |     |    |          |     |                                                                                                                                                                                                          |          | t: 22.3%<br>vs. 13.1%;<br>OR =<br>1.91, 95%<br>CI: 1.12–<br>3.26,<br>P=0.02                                                                |     |    |     |        |     |
| Buhrman,<br>M (2004).<br>Sweden <sup>114</sup> | Brain,<br>spinal<br>cord, and<br>nerve<br>disorders | RCT | 56 | Internet | 2 m | Cognitive and<br>behavioral<br>coping<br>strategies,<br>psychosocial<br>and<br>behavioral<br>con-sequences<br>of pain,<br>beliefs and<br>attitudes of<br>pain,<br>measuring<br>anxiety and<br>depression | Indirect | Significa<br>nt<br>improvem<br>ents in<br>catastrop<br>hizing,<br>control<br>over pain,<br>and<br>ability to<br>decrease<br>it             | Yes | 4  | No  |        | Yes |
| Buhrman,<br>M (2013).<br>Sweden <sup>89</sup>  | Brain,<br>spinal<br>cord, and<br>nerve<br>disorders | RCT | 76 | Internet | 6 m | Engagement,<br>pain<br>willingness,<br>symptoms of<br>depression<br>and anxiety,<br>cognitive and<br>behavioral,<br>pain severity,<br>and life<br>satisfaction                                           | Indirect | Significan<br>t<br>increases<br>in<br>activity<br>engageme<br>nt and<br>willingne<br>ss to<br>tolerate<br>pain,<br>reduction<br>s on pain- | Yes | No | Yes | Usable | Yes |

| Author (Year), Country                       | Condition                        | Design | N    | Intervention        | Duration | Primary Outcome                           | Measurement | Significance                                                                                          | Yes | No | No | Yes |
|----------------------------------------------|----------------------------------|--------|------|---------------------|----------|-------------------------------------------|-------------|-------------------------------------------------------------------------------------------------------|-----|----|----|-----|
| Chan, DS (2003). USA <sup>57</sup>           | Lung and airway disorders        | RCT    | 10   | Telemonitoring      | 6 m      | Medication adherence, and disease control | Indirect    | Significant                                                                                           | Yes | No | No | Yes |
| Chen, ZW (2008). China <sup>44</sup>         | NS                               | RCT    | 1895 | Mobile              | 2 m      | Attendance rate                           | Indirect    | Attendance rates of the control, SMS, and telephone groups were 80.5%, 87.5%, and 88.3%, respectively | Yes | No | No | Yes |
| Cho, JH (2006). Korea <sup>138</sup>         | Hormonal disorders               | RCT    | 80   | Internet            | 30 m     | HbA1c level                               | Direct      | Significant p<0.009                                                                                   | Yes | No | No | Yes |
| Christensen, A (2010). Poland <sup>158</sup> | Heart and blood vessel disorders | RCT    | 784  | Electronic reminder | 12 m     | Medication adherence                      | Indirect    | Significant: 88% vs. 86% P = .072; ES =                                                               | Yes | No | No | Yes |

|                                                 |                         |                  |        |            |      |                                                                                                    |          |                                                  |     |    |     |        |     |
|-------------------------------------------------|-------------------------|------------------|--------|------------|------|----------------------------------------------------------------------------------------------------|----------|--------------------------------------------------|-----|----|-----|--------|-----|
| Christensen, H (2004). Australia <sup>115</sup> | Mental health disorder  | RCT              | 525    | Internet   | 12 m | Depression rate, dysfunctional, psychological behavior therapy knowledge, and lifestyle treatments | Indirect | 0.06, 95% CI, 0.01-0.12<br>Significant           | Yes | 4  | No  |        | No  |
| Claborn, KR (2014). USA <sup>81</sup>           | Immune disorders        | RCT              | 92     | Internet   | NS   | Self-efficacy, and medication adherence                                                            | Indirect | Not significant                                  | No  | No | Yes | Usable | Yes |
| Coyle, D (2009). UK <sup>55</sup>               | Mental health disorders | Case study       | 22     | Video-game | NS   | Client-therapist relationship, and engagement in the therapeutic process                           | Indirect | Significant                                      | Yes | No | No  |        | Yes |
| Danaher, BG (2006). USA <sup>40</sup>           | Health hazard           | RCT              | 2523   | Internet   | 12 m | Participant visits and duration                                                                    | Indirect | Significant                                      | Yes | 4  | No  |        | Yes |
| Delbanco, T (2012). USA <sup>200</sup>          | NS                      | Quasi-experiment | 13 564 | Internet   | 12 m | Behaviors' perception, benefits, and negative consequences                                         | Indirect | Increased health control 77%-87%, and medication | Yes | No | No  |        | Yes |

| Author (Year), Country                      | Condition                               | Study Design | N    | Intervention | Duration | Outcome                                                | Measurement | Effect Size       | Significance                                                                                                                             | Adherence | Cost | Usability | Conclusion |     |
|---------------------------------------------|-----------------------------------------|--------------|------|--------------|----------|--------------------------------------------------------|-------------|-------------------|------------------------------------------------------------------------------------------------------------------------------------------|-----------|------|-----------|------------|-----|
| Downer, SR (2005). Australia <sup>160</sup> | Skin disorders                          | Cohort       | 2864 | Mobile       | 2 m      | Failure to attendance rate (FTA)                       | Indirect    | adherence 60%-78% | Significant (14.2% vs 23.4%; P<0.001).                                                                                                   | Yes       | No   | No        | Yes        |     |
| Espie, CA (2012). UK <sup>152</sup>         | Brain, spinal cord, and nerve disorders | RCT          | 164  | Internet     | 2 m      | Sleep and day time function                            | Indirect    |                   | 20% improvement in sleep efficiency                                                                                                      | Yes       | 4    | No        | Yes        |     |
| Farmer, T (2014). UK <sup>161</sup>         | Immune disorders                        | RCT          | NS   | Mobile       | 12 m     | Attendance rate                                        | Direct      |                   | Did not attend' rates decreased from 28% to 24% ( $p < 0.005$ ) and by 10% from 28% to 18% ( $p < 0.05$ ) for sexual health appointments | Yes       | No   | No        | Yes        |     |
| Feldman, PH (2005). USA <sup>90</sup>       | Heart and blood vessel disorders        | RCT          | 628  | Internet     | 6 w      | Self-management, heart failure (HF) specific outcomes, | Indirect    |                   | Positive impact on medication knowledge                                                                                                  | Yes       | 4    | Yes       | Usable     | Yes |



|                                      |                    |               |     |                |     | health-related quality of life, and usability         |          | e, diet, and weight monitoring. Cost-effective in improving clinical outcomes                                                                                                                 |     |    |     |        |     |
|--------------------------------------|--------------------|---------------|-----|----------------|-----|-------------------------------------------------------|----------|-----------------------------------------------------------------------------------------------------------------------------------------------------------------------------------------------|-----|----|-----|--------|-----|
| Fisher, J (2012). USA <sup>110</sup> | Hormonal disorders | Cross-section | 111 | Social network | 1 m | Health status, SoMe usability, and perceived barriers | Indirect | 83% used SoMe, 65% wanted providers to use SoMe for setting appointments, reminders, reporting diagnostic test results, prescription notifications, health information, and as a forum to ask | Yes | No | Yes | Usable | Yes |

|                                             |                         |        |     |          |      |                                                  |          | general questions                                                                                                |     |    |    |  |     |
|---------------------------------------------|-------------------------|--------|-----|----------|------|--------------------------------------------------|----------|------------------------------------------------------------------------------------------------------------------|-----|----|----|--|-----|
| Fonda, SJ (2009). USA <sup>139</sup>        | Hormonal disorders      | RCT    | 104 | Internet | 12 m | Assessment of diabetes distress, and HbA1c level | Direct   | Significant                                                                                                      | Yes | 5  | No |  | No  |
| Franklin, VL (2008). UK <sup>51</sup>       | Hormonal disorders      | RCT    | 64  | Mobile   | 12 m | Content of patients' messages                    | Indirect | Improve engagement                                                                                               | Yes | 4  | No |  | Yes |
| Franklin, VL (2006). UK <sup>65</sup>       | Hormonal disorders      | RCT    | 92  | Mobile   | 12 m | HbA1c, Self-efficacy, and adherence rate         | Direct   | Self-efficacy 62.1 ± 6.6, 95% CI +2.6, +7.5, P = 0.003), adherence rate 77.2 ± 16.1, 95% CI +0.4, +17.4, P=0.042 | Yes | 4  | No |  | Yes |
| Furber, GV (2011). Australia <sup>188</sup> | Mental health disorders | Cohort | 80  | Mobile   | 7 m  | Message frequency, and length of conversations   | Indirect | Safe, practical way of maintaining contact and coordinating meetings                                             | Yes | No | No |  | Yes |

|                                                  |                                       |     |        |                |     |                                                                                                         |          |                                                                                                         |     |    |     |        |     |
|--------------------------------------------------|---------------------------------------|-----|--------|----------------|-----|---------------------------------------------------------------------------------------------------------|----------|---------------------------------------------------------------------------------------------------------|-----|----|-----|--------|-----|
| Gabriele, JM (2011). USA <sup>72</sup>           | Disorders of nutrition and metabolism | RCT | 104    | Social network | 3 m | Weight and height, low-fat eating, high-fiber intake, physical activity, engagement, and social support | Direct   | Significant                                                                                             | Yes | 4  | No  |        | Yes |
| Galiano-Castillo, N (2014). Spain <sup>58</sup>  | Cancer                                | RCT | 30     | Telemonitoring | NS  | level of agreement between lymphedema assessment                                                        | Indirect | Reliability estimates ( ) $\geq$ 0.90                                                                   | Yes | No | No  |        | Yes |
| Ginsburg, O. M (2014). Bangladesh <sup>155</sup> | Cancer                                | RCT | 22,337 | Mobile         | 4 m | Breast health promotion, clinical breast examination, and patient navigation                            | Indirect | Significant                                                                                             | Yes | 4  | No  |        | Yes |
| Glasgow, RE (2011). USA <sup>80</sup>            | Hormonal disorders                    | RCT | 270    | Internet       | 4 m | Health literacy, usability, eating pattern, physical activity, and medication adherence                 | Direct   | Improve healthy eating (r=.20, p=.04), reduce dietary fat (r=-.31, p=.001); improve in exercise (r=.20, | Yes | 4  | Yes | Usable | No  |

|                                         |                         |                  |     |          |      |                                                                                                                                             |          |                                                                                  |     |   |     |        |     |
|-----------------------------------------|-------------------------|------------------|-----|----------|------|---------------------------------------------------------------------------------------------------------------------------------------------|----------|----------------------------------------------------------------------------------|-----|---|-----|--------|-----|
| Glasgow, RE (2012). USA <sup>167</sup>  | Hormonal disorders      | RCT              | 463 | Internet | 12 m | Changes in health behaviors of healthy eating, physical activity, adherence to medication, HbA1c, BMI, lipids, BP, and psychosocial factors | Direct   | Significant improvement in health behaviors in all conditions (d for ES=.09-.16) | Yes | 4 | No  |        | Yes |
| Glynn, SM (2010). USA <sup>91</sup>     | Mental health disorder  | Quasi-experiment | 42  | Internet | 12 m | Thinking disturbance, withdrawal-retardation, hostile-suspiciousness, anxious-depression                                                    | Indirect | Not significant                                                                  | No  | 3 | Yes | Usable | Yes |
| Gold, J (2010). Australia <sup>71</sup> | NS                      | Cohort           | 43  | Mobile   | 2 m  | Behavior change, content                                                                                                                    | Indirect | Significant                                                                      | Yes | 4 | No  |        | Yes |
| Granholm, E (2012). USA <sup>67</sup>   | Mental health disorders | RCT              | 55  | Mobile   | 3 m  | Medication adherence, number of social interactions, and severity of auditory hallucination                                                 | Indirect | Significant                                                                      | Yes | 4 | No  |        | Yes |

| Gray, JE (2000). USA <sup>69</sup>     | Disorders of nutrition and metabolism | RCT              | 56  | Telemonitoring | 18 m | Quality of care, length of hospital stay, and visit | Indirect | Significant with all quality of care                                                 | Yes | No | No  |        | Yes |
|----------------------------------------|---------------------------------------|------------------|-----|----------------|------|-----------------------------------------------------|----------|--------------------------------------------------------------------------------------|-----|----|-----|--------|-----|
| Green, BB (2008). USA <sup>77</sup>    | Heart and blood vessel disorders      | RCT              | 780 | Telemonitoring | 12 m | % of patients with controlled BP, and SBP and DBP   | Direct   | Increased % of patients with controlled BP, and improved BP                          | Yes | 1  | No  |        | Yes |
| Greene, JA (2011). USA <sup>111</sup>  | Hormonal disorders                    | Case study       | 480 | Social network | NS   | Evaluated the posts                                 | Indirect | Share personal clinical information, request feedback, and receive emotional support | Yes | No | Yes | Usable | Yes |
| Greysen, SR (2014). USA <sup>189</sup> | NS                                    | Quasi-experiment | 30  | Internet       | NS   | Patient engagement in discharge                     | Indirect | 70% accessed their personal health record to view their medication                   | Yes | No | No  |        | Yes |

| Author (Year, Country)                  | Condition | Design        | N   | Intervention   | Duration | Outcomes                                                                       | Impact   | Intervention Description                                                              | Effectiveness | Cost | Acceptability | Usability  | Feasibility |
|-----------------------------------------|-----------|---------------|-----|----------------|----------|--------------------------------------------------------------------------------|----------|---------------------------------------------------------------------------------------|---------------|------|---------------|------------|-------------|
| Gustafson, DH (2001). USA <sup>74</sup> | Cancer    | RCT           | 246 | Social network | 36 m     | Measured aspects of participation in care, social support, and quality of life | Indirect | Providing information and social support, and increasing participation in health care | Yes           | 3    | No            |            | Yes         |
| Gustafson, DH (2005). USA <sup>92</sup> | Cancer    | Cohort        | 286 | Internet       | 4 m      | Track web use, and quality of life                                             | Indirect | Positive impact on low-income women with breast cancer                                | Yes           | 3    | Yes           | Usable     | Yes         |
| Gutierrez, N (2014). USA <sup>83</sup>  | NS        | Cross-section | 498 | Internet       | 3 m      | Health literacy                                                                | Indirect | Not significant                                                                       | No            | No   | Yes           | Usable     | No          |
| Habibović, M (2014).                    | Heart and | RCT           | 146 | Internet       | 11 m     | Anxiety, depression,                                                           | Indirect | Not significant                                                                       | No            | No   | Yes           | Not usable | No          |

|                                       |                        |     |     |          |     |                                                                                                  |                        |                                                                                                                                     |     |    |     |        |     |  |
|---------------------------------------|------------------------|-----|-----|----------|-----|--------------------------------------------------------------------------------------------------|------------------------|-------------------------------------------------------------------------------------------------------------------------------------|-----|----|-----|--------|-----|--|
| Netherlands <sup>197</sup>            | blood vessel disorders |     |     |          |     |                                                                                                  | optimism and pessimism | t                                                                                                                                   |     |    |     |        |     |  |
| Harris, LT (2010). USA <sup>107</sup> | Immune disorders       | RCT | 224 | Mobile   | 3 m | Medication adherence, user evaluations, and response rates                                       | Indirect               | Medication adherence (73%), response rate (42.8%)                                                                                   | Yes | No | Yes | Usable | No  |  |
| Hasin, DS (2014). USA <sup>93</sup>   | Health hazard          | RCT | 41  | Mobile   | 2 m | Number of drinks per drinking day, percent days abstinent, patient perceptions, and satisfaction | Indirect               | Significant ( $p < .001$ )                                                                                                          | Yes | No | Yes | Usable | Yes |  |
| Heisler, M (2014). USA <sup>168</sup> | Hormonal disorders     | RCT | 188 | Internet | 3 m | Knowledge, diabetes distress, self-efficacy, medication adherence, and HbA1c                     | Indirect               | Improvements in satisfaction with medication information (helpfulness, $P = 0.007$ ; clarity, $P = 0.03$ ) and in diabetes distress | Yes | 4  | No  |        | Yes |  |

|                                          |                                       |        |       |                |      |                                                       |          |                                                                                                     |     |    |    |     |
|------------------------------------------|---------------------------------------|--------|-------|----------------|------|-------------------------------------------------------|----------|-----------------------------------------------------------------------------------------------------|-----|----|----|-----|
| Helander, E (2014). USA <sup>178</sup>   | Disorders of nutrition and metabolism | Cohort | 4,863 | Internet       | 7 m  | Eating behavior                                       | Indirect | (P < 0.001)<br>Only 9.89% of Active users had a positive trend in their average healthiness ratings | No  | 5  | No | No  |
| Herbst, N (2014). Germany <sup>116</sup> | Mental health disorders               | RCT    | 34    | Internet       | 6 m  | Change in the severity symptoms                       | Indirect | Significant (d = 0.82)                                                                              | Yes | 4  | No | Yes |
| Heyworth, L (2014). USA <sup>169</sup>   | NS                                    | RCT    | 60    | Internet       | 6 m  | medication discrepancies and potential adverse effect | Indirect | 90% would like to use SMMRT for medication reconciliation                                           | Yes | No | No | Yes |
| Holtz, B (2014). USA <sup>179</sup>      | Disorders of nutrition and metabolism | RCT    | 26    | Social network | 9 m  | Body weight                                           | Indirect | Participants were satisfied and lost weight                                                         | Yes | No | No | Yes |
| Houston, TK (2002). USA <sup>117</sup>   | Mental health disorders               | Cohort | 103   | Social network | 12 m | Resolved depressive symptoms;                         | Indirect | Significant in resolving                                                                            | Yes | No | No | No  |



|                                       |                                       |               |     |              |     |                                                                               |          |                                                                                                               |     |    |    |     |
|---------------------------------------|---------------------------------------|---------------|-----|--------------|-----|-------------------------------------------------------------------------------|----------|---------------------------------------------------------------------------------------------------------------|-----|----|----|-----|
| Hunter, CM (2008). USA <sup>180</sup> | Disorders of nutrition and metabolism | RCT           | 446 | Internet     | 6 m | Weight, body fat, waist circumference, eating behaviors and physical activity | Direct   | changes in social support<br>depression<br>Significant for all outcomes<br>p<0.001                            | Yes | No | No | Yes |
| Hurling, R (2007). UK <sup>70</sup>   | NS                                    | RCT           | 77  | Mobile       | 4 m | physical activity, body weight, and BP                                        | Direct   | Significant increase in perceived control (P<.001), % body fat -2.18, SD = 0.59 vs -0.17, SD = 0.81; P = .04) | Yes | 4  | No | Yes |
| Idriss, SZ (2009). USA <sup>190</sup> | Skin disorders                        | Cross-section | 260 | Social media | 6 m | Perceived benefits                                                            | Indirect | 49.5% perceived improvements in quality of life; Psoriasis severity (41.0%), and improved quality of          | Yes | No | No | Yes |

|                                       |                                         |               |      |            |      |                                                                                                                                                          |          |                                                                      |     |    |     |        |     |
|---------------------------------------|-----------------------------------------|---------------|------|------------|------|----------------------------------------------------------------------------------------------------------------------------------------------------------|----------|----------------------------------------------------------------------|-----|----|-----|--------|-----|
| Irvine, AB (2013). USA <sup>94</sup>  | Brain, spinal cord, and nerve disorders | RCT           | 368  | Internet   | 6 m  | Physical activity, BMI, attitudes and knowledge, behavioral self-efficacy, barriers to exercise, behavioral intention, stage of change, and satisfaction | Direct   | life (p=.002)<br>Significant treatment effects p=.001                | Yes | 4  | Yes | Usable | Yes |
| Iverson, SA (2008). USA <sup>95</sup> | Bone, joint, and muscle disorders       | Cross-section | 154  | Internet   | 10 w | Behavior changes, and patient-physician relationship                                                                                                     | Indirect | 55% changed their health thinking, and 46% changed their behavior    | Yes | No | Yes | Usable | Yes |
| Johnson, F (2011). UK <sup>125</sup>  | Disorders of nutrition and metabolism   | Cohort        | 3621 | Internet   | 41 m | BMI                                                                                                                                                      | Direct   | Significant weight loss (men: OR=3.45 p<.001; women: OR=5.05 p<.001) | Yes | 4  | No  |        | Yes |
| Johnston, JD (2012).                  | Disorders of                            | Cohort        | 45   | Video game | 3 m  | Weight, BMI, % of weight                                                                                                                                 | Direct   | Significant: weight                                                  | Yes | 4  | No  |        | Yes |

|                                                 |                                         |     |     |                |      |                                                                                                                                              |          |                                                                                                             |     |   |    |  |     |
|-------------------------------------------------|-----------------------------------------|-----|-----|----------------|------|----------------------------------------------------------------------------------------------------------------------------------------------|----------|-------------------------------------------------------------------------------------------------------------|-----|---|----|--|-----|
| USA <sup>30</sup>                               | nutrition and metabolism                |     |     |                |      | change, and health behaviors (i.e., weight loss self-efficacy, physical activity, fruit and vegetable consumption)                           |          | -4.2 (p=.006), physical activity (p=.008), self-efficacy (p<.001), fruit and vegetable consumption (p=.007) |     |   |    |  |     |
| Kaplan, K (2011). USA <sup>45</sup>             | Brain, spinal cord, and nerve disorders | RCT | 300 | Social network | 12 m | Recovery, quality of life, social support, and distress                                                                                      | Indirect | Not-significant (p ¼ 0.03)                                                                                  | No  | 3 | No |  | Yes |
| Kato, PM (2008). USA <sup>75</sup>              | Cancer                                  | RCT | 375 | Video-game     | 3 m  | Adherence, self-efficacy, knowledge, stress, and quality of life                                                                             | Indirect | Significant                                                                                                 | Yes | 4 | No |  | Yes |
| Kay-Lambkin, F (2011). Australia <sup>162</sup> | Mental health disorder                  | RCT | 97  | Internet       | 12 m | Depressive symptoms, quantity and frequency of opiate use, hazardous use, optimism about the future, and indirect estimates to suicide risk, | Indirect | All outcomes significant                                                                                    | Yes | 4 | No |  | Yes |

|                                            |                                       |     |     |          |      | readiness to change, therapeutic alliance, treatment attendance                   |          |                                                                                                            |     |    |    |     |  |
|--------------------------------------------|---------------------------------------|-----|-----|----------|------|-----------------------------------------------------------------------------------|----------|------------------------------------------------------------------------------------------------------------|-----|----|----|-----|--|
| Kerr, J (2008). USA <sup>118</sup>         | Disorders of nutrition and metabolism | RCT | 401 | Internet | 12 m | Depression                                                                        | Indirect | Reduce depressive symptoms from 13.8 to 18.9 (ES 0.7–0.9)                                                  | Yes | No | No | Yes |  |
| Keyserling, TC (2014). USA <sup>176</sup>  | Heart and blood vessel disorders      | RCT | 385 | Internet | 12 m | Blood pressure, blood lipid levels, lifestyle behaviors, and medication adherence | Direct   | Reduction in FRS at 4 month (–1.5% [95% CI, –2.2% to –0.9%] and 12 month (–1.7% [95% CI, –2.6% to –0.8%])) | Yes | No | No | Yes |  |
| Kim, CJ (2006). South Korea <sup>181</sup> | Hormonal disorders                    | RCT | 73  | Internet | 3 m  | Physical activity, FBG, and glycosylated hemoglobin                               | Direct   | Significant increase in physical activity (P<0.001)                                                        | Yes | 4  | No | Yes |  |

|                                            |                    |                  |    |          |      |                                                            |        |                                                                                    |                                               |     |    |    |     |
|--------------------------------------------|--------------------|------------------|----|----------|------|------------------------------------------------------------|--------|------------------------------------------------------------------------------------|-----------------------------------------------|-----|----|----|-----|
| Kim, HS (2007). South Korea <sup>137</sup> | Hormonal disorders | RCT              | 51 | Mobile   | 6 m  | HbA1c, FBG, and 2HPMG                                      | Direct | , decrease FBG (P<0.01) and glycosylated hemoglobin (P<0.01)                       | HbA1c -1.05% at 6 m, 2HPMG -63.1 mg/dl at 6 m | Yes | No | No | Yes |
| Kim, HS (2008). South Korea <sup>199</sup> | Hormonal disorders | RCT              | 40 | Internet | 6 m  | Glycosylated hemoglobin, FBG, 2HPMG, and total cholesterol | Direct | Significant decrease in glycosylated hemoglobin, FBG, 2HPMG, and total cholesterol |                                               | Yes | 2  | No | Yes |
| Kim, SI (2008). South Korea <sup>140</sup> | Hormonal disorders | Quasi-experiment | 34 | Mobile   | 12 m | HbA1c, FBG, and 2HPMG                                      | Direct | HbA1c -1.49% at 12 m. p<0.05), 2HPMG -102.9 mg/dl at                               |                                               | Yes | No | No | Yes |

|                                                |                                         |            |     |                |      |                                            |          |                                                                                                                             |                |     |    |     |        |     |
|------------------------------------------------|-----------------------------------------|------------|-----|----------------|------|--------------------------------------------|----------|-----------------------------------------------------------------------------------------------------------------------------|----------------|-----|----|-----|--------|-----|
| King, SN (2012). USA <sup>36</sup>             | Brain, spinal cord, and nerve disorders | Case study | 6   | Video-game     | 1 m  | Look, graphic features, functionality      | Indirect | Significant                                                                                                                 | 12 m<br>p<0.05 | Yes | No | Yes | Usable | Yes |
| Kinney, AY (2014). USA <sup>60</sup>           | Cancer                                  | RCT        | 481 | Telemonitoring | 9 m  | Adherence to regular colonoscopy screening | Direct   | Telehealth group was almost three times as likely to get screened (odds ratio, 2.83; 95% CI, 1.87 to 4.28; <i>P</i> < .001) |                | Yes | No | No  |        | Yes |
| Kiselev, AR (2012). Russia <sup>153</sup>      | Heart and blood vessel disorders        | RCT        | 199 | Mobile         | 12 m | BP, BMI, and smoking history               | Direct   | 77% of patients achieved the BP level goal                                                                                  |                | Yes | No | No  |        | Yes |
| Kornman, K PA (2010). Australia <sup>126</sup> | Disorders of nutrition and metabolism   | RCT        | 49  | Mobile         | 12 m | Engagement, and BMI                        | Direct   | Encouraging (88%) and educational (75%)                                                                                     |                | Yes | No | No  |        | No  |

|                                                  |                                    |     |     |          |      |                                                                                                                                                                   |          |                                                                                                                                                                                                                                                                                                                                          |     |    |     |        |     |
|--------------------------------------------------|------------------------------------|-----|-----|----------|------|-------------------------------------------------------------------------------------------------------------------------------------------------------------------|----------|------------------------------------------------------------------------------------------------------------------------------------------------------------------------------------------------------------------------------------------------------------------------------------------------------------------------------------------|-----|----|-----|--------|-----|
| Krishna, S<br>(2003).<br>USA <sup>96</sup>       | Lung<br>and<br>airway<br>disorders | RCT | 228 | Internet | 12 m | Health<br>outcomes,<br>resource<br>utilization,<br>inhaled<br>steroids,<br>physician<br>visits, use of<br>quick relief<br>medicine, and<br>activity<br>limitation | Indirect | Increased<br>knowledg<br>e,<br>decreased<br>symptom<br>(81 vs.<br>51/year),<br>decreased<br>emergenc<br>y visits<br>(1.93 vs.<br>0.62 per<br>year),<br>decreased<br>inhaled<br>corticoste<br>roids (434<br>vs. 754),<br>decrease<br>urgent<br>physician<br>visits (r<br>0.37) and<br>use of<br>quick-<br>relief<br>medicines<br>(r 0.30) | Yes | 5  | Yes | Usable | Yes |
| Zernicke,<br>KA (2014).<br>Canada <sup>156</sup> | Cancer                             | RCT | 62  | Internet | 8 w  | Feasibility,<br>anxiety,<br>depression,<br>anger, vigor,<br>fatigue, and<br>confusion                                                                             | Indirect | Significa<br>nt for<br>mood<br>disturban<br>ce ( $d =$<br>0.44, $p = .$<br>049),<br>stress                                                                                                                                                                                                                                               | Yes | No | Yes | Usable | Yes |

|                                            |                                  |                  |     |          |      |                                       |          |                                                                                                                                        |     |    |     |            |     |
|--------------------------------------------|----------------------------------|------------------|-----|----------|------|---------------------------------------|----------|----------------------------------------------------------------------------------------------------------------------------------------|-----|----|-----|------------|-----|
|                                            |                                  |                  |     |          |      |                                       |          | symptoms ( $d = 0.49, p = .021$ ), spirituality ( $d = 0.37, p = .040$ ), and mindfully acting with awareness ( $d = 0.50, p = .026$ ) |     |    |     |            |     |
| Schweier, R (2014). Germany <sup>196</sup> | Heart and blood vessel disorders | RCT              | 699 | Internet | 12 m | Physical activity and eating behavior | Indirect | Non-significant trends in behavioral change related to physical activity and eating behavior                                           | No  | 4  | Yes | Not usable | Yes |
| Kulkarni, A (2014). Canada <sup>175</sup>  | Women's health issues            | Quasi-experiment | 118 | Internet | NS   | Preferences for delivery              | Indirect | Significant increase in knowledge about vaginal delivery                                                                               | Yes | No | No  |            | Yes |



| Author (Year), Country                     | Condition                               | Design           | N    | Intervention   | Duration | Outcome                                                               | Measurement | Effectiveness                                                                                                           | Acceptability | Feasibility | Usability | Equity |     |
|--------------------------------------------|-----------------------------------------|------------------|------|----------------|----------|-----------------------------------------------------------------------|-------------|-------------------------------------------------------------------------------------------------------------------------|---------------|-------------|-----------|--------|-----|
| Kwon, HS (2004). Korea <sup>39</sup>       | Hormonal disorders                      | RCT              | 110  | Telemonitoring | 3 m      | HbA1c levels                                                          | Direct      | Significant decrease in HbA1c (6.94 vs. 7.62%; p=0.001, respectively) and Caesarean section from 47% to 76% (P < 0.001) | Yes           | No          | No        | Yes    |     |
| Jelsma, D (2014). Netherland <sup>56</sup> | Brain, spinal cord, and nerve disorders | Quasi-experiment | 48   | Video-game     | 6 w      | Motor performance                                                     | Direct      | Significant improvement in motor performance                                                                            | Yes           | No          | No        | Yes    |     |
| Lancioni, GE (2012). Italy <sup>191</sup>  | Brain, spinal cord, and nerve disorders | Case study       | 2    | Mobile         | NS       | Communication and engagement skills                                   | Indirect    | Effective communication and social interaction                                                                          | Yes           | No          | No        | Yes    |     |
| Lee, CJ (2010). USA <sup>97</sup>          | Cancer                                  | Cross-section    | 2013 | Internet       | 12 m     | Medical decision making, self-efficacy, and frequency of doctor visit | Indirect    | More active participants in medical decision                                                                            | Yes           | 4           | Yes       | Usable | Yes |

|                                         |                    |                  |      |          |      |                                            |          |                                                                                                      |     |    |     |        |     |
|-----------------------------------------|--------------------|------------------|------|----------|------|--------------------------------------------|----------|------------------------------------------------------------------------------------------------------|-----|----|-----|--------|-----|
| Lee, TI (2007). Taiwan <sup>185</sup>   | Hormonal disorders | Quasi-experiment | 274  | Internet | 9 m  | FBG, HbA1c, total cholesterol, TG, and HDL | Direct   | making (b=.06, p<.05)<br>Significant improvement in FBG, HbA1c, and total cholesterol                | Yes | 2  | No  |        | Yes |
| Lester, RT (2010). Kenya <sup>192</sup> | Immune disorders   | RCT              | 581  | Mobile   | 16 m | Adherence and viral suppression rates      | Indirect | Adherence rate 168 of 273 patients' vs. 132 of 265, suppressed viral loads 156 of 273 vs. 128 of 265 | Yes | No | No  |        | Yes |
| Lewis, N (2009). USA <sup>98</sup>      | Cancer             | Cross-section    | 1594 | Internet | 23 m | Health media uses                          | Indirect | Bringing information to physicians, medical decision making, and seeking information                 | Yes | No | Yes | Usable | Yes |

|                                          |                    |               |     |                |      |                                                                            |          | on                                                                                                                                   |     |    |     |        |     |
|------------------------------------------|--------------------|---------------|-----|----------------|------|----------------------------------------------------------------------------|----------|--------------------------------------------------------------------------------------------------------------------------------------|-----|----|-----|--------|-----|
| Liew, SM (2009). Malaysia <sup>163</sup> | Hormonal disorders | RCT           | 931 | Mobile         | 6 m  | Attendance rate                                                            | Indirect | Non-attendance rates in SMS OR = 0.62, 95% CI = 0.41 to 0.93, p=0.020, telephone reminder OR = 0.53, 95% CI = 0.35 to 0.81, p=0.003) | Yes | No | No  |        | Yes |
| Lorig, KR (2006). USA <sup>99</sup>      | Hormonal disorders | RCT           | 958 | Internet       | 12 m | Variable of health status, health behavior, utilization, and self-efficacy | Indirect | Significant improvements in health and self-efficacy                                                                                 | Yes | 4  | Yes | Usable | No  |
| Magnezi, R (2014). Israel <sup>52</sup>  | NS                 | Cross-section | 296 | Social network | 4 m  | Usefulness, and patient activation                                         | Indirect | Significant                                                                                                                          | Yes | 4  | Yes | Usable | Yes |
| McCann, L (2009). UK <sup>157</sup>      | Cancer             | RCT           | 112 | Mobile         | 7 m  | Perception                                                                 | Indirect | Improvement in communication with health care                                                                                        | Yes | No | No  |        | Yes |

|                                          |                    |                  |    |          |      |                                           |          |                                                                                                            |     |    |    |  |     |
|------------------------------------------|--------------------|------------------|----|----------|------|-------------------------------------------|----------|------------------------------------------------------------------------------------------------------------|-----|----|----|--|-----|
|                                          |                    |                  |    |          |      |                                           |          | provider, and self-management of symptoms                                                                  |     |    |    |  |     |
| McCarrier, KP (2009). USA <sup>141</sup> | Hormonal disorders | RCT              | 77 | Internet | 12 m | HbA1C level                               | Direct   | Non-significant decrease in HbA1C -0.48; 95% CI (-1.22 to 0.27; p=0.160), however, increased self-efficacy | No  | 4  | No |  | No  |
| McInnes, DK (2013). USA <sup>198</sup>   | Immune disorders   | Quasi-experiment | 14 | Internet | 3 m  | Medication adherence, and self-efficacy   | Indirect | Not-significant in medication adherence, but, improved self-efficacy                                       | No  | 4  | No |  | No  |
| McInnes, DK (2014). USA <sup>164</sup>   | NS                 | Quasi-experiment | 20 | Mobile   | 8 w  | Attendance rate, and hospitalization rate | Direct   | Significant reduction in emergenc                                                                          | Yes | No | No |  | Yes |

|                                      |                    |     |      |                |     |                                                                                                                 |          |                                                                |                                                                    |     |    |     |            |     |
|--------------------------------------|--------------------|-----|------|----------------|-----|-----------------------------------------------------------------------------------------------------------------|----------|----------------------------------------------------------------|--------------------------------------------------------------------|-----|----|-----|------------|-----|
| McKay, HG (2008). USA <sup>133</sup> | Health hazard      | RCT | 1028 | Internet       | 6 m | Smoking cessation, self-efficacy, dependence, depression, physical activity, pharmacotherapy use, and usability | Indirect | Primary department visits (p=.01) and hospitalizations (p=.08) | No significant change                                              | No  | 4  | Yes | Not usable | No  |
| McKay, HG (2002). USA <sup>53</sup>  | Hormonal disorders | RCT | 160  | Social network | 3 m | Physiologic, behavioral, mental health, and usability                                                           | Indirect |                                                                | Significant improvement, especially on dietary behavior            | Yes | 5  | Yes | Usable     | Yes |
| McKay, HG (2001). USA <sup>54</sup>  | Hormonal disorders | RCT | 78   | Social network | 2 m | Physical activity and depression                                                                                | Indirect |                                                                | Significant improvement in exercise 29.59 (P<0.001); walking 15.62 | Yes | No | No  |            | Yes |

|                                           |                        |     |      |          |      |                                                    |          |                                                                                       |                                                |    |    |  |     |
|-------------------------------------------|------------------------|-----|------|----------|------|----------------------------------------------------|----------|---------------------------------------------------------------------------------------|------------------------------------------------|----|----|--|-----|
|                                           |                        |     |      |          |      |                                                    |          |                                                                                       | (P<0.001)<br>;<br>depression 0.06<br>(P=0.809) |    |    |  |     |
| McMahon, G (2005). USA <sup>143</sup>     | Hormonal disorders     | RCT | 104  | Internet | 12 m | HbA1C , BP                                         | Direct   | Significant decrease in HbA1C (P 0.05), BP (p 0.01), HDL and triglycerides (p 0.05)   | Yes                                            | 5  | No |  | Yes |
| Meglic, M (2010). Slovenia <sup>170</sup> | Mental health disorder | RCT | 46   | Internet | 6 m  | Medication adherence and outcome measures          | Indirect | Improvement in adherence OR = 10.0, p=.03, and outcome ORs 0.35 to 18; p-.003 to .20) | Yes                                            | 4  | No |  | Yes |
| Meigs, JB (2003). USA <sup>144</sup>      | Hormonal disorders     | RCT | 1598 | Internet | 12 m | HbA1c, LDL cholesterol, BP, eye and foot screening | Direct   | Significant decrease in HbA1c P=0.09, LDLP =0.02),                                    | Yes                                            | No | No |  | Yes |

|                                                          |                                                        |                   |    |                    |     |                                           |          |                                                                                                                                                      |     |    |     |        |     |
|----------------------------------------------------------|--------------------------------------------------------|-------------------|----|--------------------|-----|-------------------------------------------|----------|------------------------------------------------------------------------------------------------------------------------------------------------------|-----|----|-----|--------|-----|
|                                                          |                                                        |                   |    |                    |     |                                           |          | foot<br>examination<br>P=0.003)                                                                                                                      |     |    |     |        |     |
| Meiland,<br>FJM<br>(2014).<br>Netherlands <sup>61</sup>  | Brain,<br>spinal<br>cord, and<br>nerve<br>disorders    | Cross-<br>section | 50 | Telemon<br>itoring | 4 m | Usefulness,<br>activity and<br>behavioral | Indirect | Significa<br>nt                                                                                                                                      | Yes | No | Yes | Usable | Yes |
| Napolitano<br>, MA<br>(2003).<br>Australia <sup>32</sup> | Disorder<br>s of<br>nutrition<br>and<br>metaboli<br>sm | RCT               | 65 | Internet           | 3 m | Number of<br>minutes<br>walking           | Indirect | Significa<br>nt<br>progress<br>in stage<br>of<br>motivatio<br>nal<br>readiness<br>,<br>increased<br>walking<br>activity F<br>(1, 48) =<br>5.2, p>.05 | Yes | 4  | No  |        | Yes |
| Nguyen,<br>HQ (2008).<br>USA <sup>122</sup>              | Lung<br>and<br>airway<br>disorders                     | RCT               | 50 | Internet           | 6 m | Dyspnea                                   | Direct   | Significa<br>nt<br>changes<br>in<br>dyspnea,<br>time<br>effects<br>p<.001,<br>exercise<br>time<br>(p=.001),                                          | Yes | 4  | No  |        | Yes |

|                                             |                                       |                  |      |          |     |                                                                  |          |                                                                          |     |    |     |        |     |
|---------------------------------------------|---------------------------------------|------------------|------|----------|-----|------------------------------------------------------------------|----------|--------------------------------------------------------------------------|-----|----|-----|--------|-----|
|                                             |                                       |                  |      |          |     |                                                                  |          | physical functioning (p=.04), and self-efficacy (p=.02)                  |     |    |     |        |     |
| Oh, E (2009). Australia <sup>159</sup>      | Mental health disorder                | Cross-section    | 3746 | Internet | 3 m | Belief, personal stigma, and social distance                     | Indirect | Helpful                                                                  | Yes | 4  | Yes | Usable | Yes |
| Osborn, CY (2013). USA <sup>100</sup>       | Hormonal disorders                    | Cross-section    | 75   | Internet | NS  | Usability, glycemic control, medication management functionality | Indirect | Improved HbA1C (Spearman rho = -0.30; p=.02)                             | Yes | 4  | Yes | Usable | Yes |
| Ostojic, V (2005). USA <sup>123</sup>       | Lung and airway disorders             | RCT              | 16   | Mobile   | 4 m | Asthma – cough, and night symptoms                               | Indirect | Asthma-cough 1.85 vs. 1.42, p<0.05; night symptoms 1.22 vs. 0.95, p<0.05 | Yes | No | No  |        | Yes |
| Park, MJ (2012). South Korea <sup>127</sup> | Disorders of nutrition and metabolism | Quasi-experiment | 67   | Mobile   | 3 m | WC, BW, BP, FPG, and serum lipids                                | Direct   | Significant: WC 3.0 cm, BW- 2.0 kg, SBP and DBP                          | Yes | No | No  |        | Yes |



|                                                      |                                                        |                          |    |          |     |                                            |          |                                                                                                                         |     |    |    |  |     |
|------------------------------------------------------|--------------------------------------------------------|--------------------------|----|----------|-----|--------------------------------------------|----------|-------------------------------------------------------------------------------------------------------------------------|-----|----|----|--|-----|
|                                                      |                                                        |                          |    |          |     |                                            |          | - 6.5 and<br>-4.6<br>mmHg,<br>TC -12.9<br>mg/dl vs<br>+1.5<br>mg/dl,<br>LDL-C<br>-1.3 mg/dl                             |     |    |    |  |     |
| Park, MJ<br>(2009).<br>South<br>Korea <sup>154</sup> | Heart<br>and<br>blood<br>vessel<br>disorders           | Quasi-<br>experim<br>ent | 49 | Mobile   | 2 m | BP, BW,<br>serum lipid<br>level            | Direct   | Significa<br>nt: SBP<br>-9.1<br>mmHg,<br>DBP 7.2<br>mmHg,<br>BW -1.6<br>kg<br>(p<0.05)<br>and WC<br>-2.8 cm<br>(p<0.05) | Yes | No | No |  | Yes |
| Parr, JM<br>(2011).<br>Australia <sup>171</sup>      | Mental<br>health<br>disorder                           | Case<br>study            | 32 | Internet | 6 m | Access and<br>perception of<br>the program | Indirect | 57%<br>reduced<br>weekly<br>intake by<br>half, 36%<br>ceased<br>use                                                     | Yes | 4  | No |  | No  |
| Patrick, K<br>(2009).<br>USA <sup>128</sup>          | Disorder<br>s of<br>nutrition<br>and<br>metaboli<br>sm | RCT                      | 65 | Mobile   | 4 m | Weight<br>change                           | Direct   | Significa<br>nt weight<br>loss -1.97<br>kg, 95%<br>CI -0.34<br>to -3.60<br>kg, P=.02                                    | Yes | No | No |  | Yes |

|                                               |                                         |                  |      |          |      |                                                                               |          |                                                                                                                                                             |     |    |    |     |
|-----------------------------------------------|-----------------------------------------|------------------|------|----------|------|-------------------------------------------------------------------------------|----------|-------------------------------------------------------------------------------------------------------------------------------------------------------------|-----|----|----|-----|
| Petersen, R (2008). USA <sup>129</sup>        | Disorders of nutrition and metabolism   | Quasi-experiment | 7743 | Internet | 12 m | Changes in eating habits, stage of change, body weight, and weight categories | Direct   | Significant increase in healthy eating habits, frequency of healthy foods eaten, weight decreased from 182.6 to 180.2 lbs (P<0.05), improve stage of change | Yes | 4  | No | Yes |
| Phillips, JH (2014). Australia <sup>195</sup> | Ears, nose, and throat disorders        | RCT              | 53   | Mobile   | 6 w  | Clinic attendance, and healed perforation                                     | Direct   | Not significant                                                                                                                                             | No  | No | No | No  |
| Plotnikoff, RC (2005). Canada <sup>182</sup>  | Brain, spinal cord, and nerve disorders | RCT              | 2121 | Internet | 3 m  | Physical activity, nutrition related to knowledge, attitudes, and behaviors   | Indirect | Improve self-efficacy, physical activity, changes in practicing healthy                                                                                     | Yes | 4  | No | Yes |

| Author (Year), Country                          | Condition                        | Study Design | N   | Intervention   | Duration | Outcomes                                                    | Measurement | Significance                                                                       | Yes | No | No | Yes |
|-------------------------------------------------|----------------------------------|--------------|-----|----------------|----------|-------------------------------------------------------------|-------------|------------------------------------------------------------------------------------|-----|----|----|-----|
| Price, M (2014). USA <sup>62</sup>              | Mental health disorders          | Cohort       | 59  | Telemonitoring | 2 m      | Depression                                                  | Indirect    | Significant                                                                        | Yes | No | No | Yes |
| Quinn, CC (2008). USA <sup>145</sup>            | Hormonal disorders               | RCT          | 30  | Internet       | 6 m      | HbA1c level                                                 | Direct      | Significant HbA1c -2.03%, vs. 0.68% (p=0.02), and medication change (23%, p=0.002) | Yes | 5  | No | Yes |
| Ralston, JD (2009). USA <sup>146</sup>          | Hormonal disorders               | RCT          | 83  | Internet       | 12 m     | Glycemic hemoglobin, SBP, DBP, and total cholesterol levels | Direct      | Glycemic hemoglobin - 0.7% (95% CI 0.21.3).                                        | Yes | 5  | No | Yes |
| Ramaekers, BL (2009). Netherlands <sup>48</sup> | Heart and blood vessel disorders | RCT          | 101 | Telemonitoring | 3 m      | Medication adherence                                        | Indirect    | Medication adherence not applicable to measure                                     | No  | No | No | Yes |
| Rami, B (2006). Australia <sup>142</sup>        | Hormonal disorders               | RCT          | 36  | Mobile         | 6 m      | HbA1c level                                                 | Direct      | HbA1c +0.15 vs. -0.05, p<0.05                                                      | Yes | No | No | No  |
| Read, E (2014).                                 | Hormonal                         | RCT          | 25  | Telemonitoring | 2 m      | Blood glucose, blood                                        | Direct      | Significant                                                                        | Yes | 4  | No | Yes |

|                                      |                  |     |    |        |      |                                         |          |                                                                                                                                                            |     |   |    |     |  |
|--------------------------------------|------------------|-----|----|--------|------|-----------------------------------------|----------|------------------------------------------------------------------------------------------------------------------------------------------------------------|-----|---|----|-----|--|
| Canada <sup>78</sup>                 | disorders        |     |    |        |      | pressure, weight, and physical activity |          | changes in weight, waist circumference, diastolic blood pressure, LDL cholesterol, and total cholesterol                                                   |     |   |    |     |  |
| Reback, CJ (2012). USA <sup>79</sup> | Immune disorders | RCT | 52 | Mobile | 10 w | Sexual behaviors, and HIV status        | Indirect | Significant decreases in methamphetamine use, unprotected sex p<0.01, increase in abstinence 13.3% vs. 48.9%; p<0.001, reductions in intercourse with HIV- | Yes | 3 | No | Yes |  |

|                                              |               |        |      |          |     |                                                                     |          |                                                                                                                                                                   |     |    |     |        |    |
|----------------------------------------------|---------------|--------|------|----------|-----|---------------------------------------------------------------------|----------|-------------------------------------------------------------------------------------------------------------------------------------------------------------------|-----|----|-----|--------|----|
|                                              |               |        |      |          |     |                                                                     |          | positive partners<br>p<0.01,<br>with HIV-<br>negative<br>partners<br>p<0.05                                                                                       |     |    |     |        |    |
| Richardson, A (2013). USA <sup>135</sup>     | Health hazard | Cohort | 1033 | Internet | 6 m | Number of visits, predictive of abstinence, and motivation to quit. | Indirect | Abstinence rates 20.68% vs. 11.13%                                                                                                                                | Yes | No | No  |        | No |
| Rodgers, A (2005). New Zealand <sup>68</sup> | Health hazard | RCT    | 1705 | Mobile   | 6 m | Quit rate at 6, 12, 26 weeks and abstaining rate                    | Indirect | Quit rate at 6 weeks was 13% vs. 28%, p<0.01; at 12 weeks was 26% vs. 41%, p<0.01; at 26 weeks was 45% vs. 56%, p<0.01; and abstaining rate was 5% vs. 8%, p<0.05 | Yes | 4  | No  |        | No |
| Rooke, SE                                    | Mental        | RCT    | 385  | Internet | NS  | feasibility,                                                        | Indirect | Telephon                                                                                                                                                          | Yes | No | Yes | Usable | No |

|                                             |                                              |     |     |          |      |                                                                            |          |                                                                                                                                                     |     |   |     |        |     |
|---------------------------------------------|----------------------------------------------|-----|-----|----------|------|----------------------------------------------------------------------------|----------|-----------------------------------------------------------------------------------------------------------------------------------------------------|-----|---|-----|--------|-----|
| (2014).<br>Australia <sup>101</sup>         | health<br>disorder                           |     |     |          |      | acceptability,<br>and cessation                                            |          | e-based<br>treatment<br>experiencing<br>stronger<br>outcomes                                                                                        |     |   |     |        |     |
| Ross, SE<br>(2004).<br>USA <sup>102</sup>   | Heart<br>and<br>blood<br>vessel<br>disorders | RCT | 107 | Internet | 12 m | Doctor-<br>patient<br>communication,<br>adherence,<br>and health<br>status | Indirect | Significant<br>adherence<br>rate<br>p=0.01,<br>satisfaction<br>with<br>doctor-<br>patient<br>communication                                          | Yes | 4 | Yes | Usable | No  |
| Rotondi, A<br>(2010).<br>USA <sup>119</sup> | Mental<br>health<br>disorder                 | RCT | 55  | Internet | 12 m | Symptoms<br>and<br>knowledge of<br>schizophrenia                           | Indirect | Significant<br>reduction<br>in<br>positive<br>symptoms<br>(p=.042,<br>d=-.88),<br>significant<br>increase<br>in<br>knowledge<br>(p=.036,<br>d=1.94) | Yes | 4 | No  |        | Yes |

|                                                |                                  |            |     |                     |      |                                                                                                                            |          |                                                                 |     |    |     |        |     |
|------------------------------------------------|----------------------------------|------------|-----|---------------------|------|----------------------------------------------------------------------------------------------------------------------------|----------|-----------------------------------------------------------------|-----|----|-----|--------|-----|
| Roy, H (2008). UK <sup>120</sup>               | Mental health disorder           | Case study | 1   | Internet            | 3 m  | Behavioral changes                                                                                                         | Indirect | Effective and helpful                                           | Yes | No | No  |        | Yes |
| Santschi, V (2007). Switzerland <sup>172</sup> | Heart and blood vessel disorders | RCT        | 25  | Electronic reminder | 4 m  | % of doses taken using MEMS/IDAS                                                                                           | Indirect | Both devices to be reliable reminders (IDAS II: 75%, MEMS: 84%) | Yes | No | No  |        | Yes |
| Scherr, D (2009). Austria <sup>38</sup>        | Heart and blood vessel disorders | RCT        | 120 | Telemonitoring      | 6 m  | Cardiovascular mortality, re-hospitalization and length of stay, evaluation of patients' functional status (BW, BP and HR) | Direct   | Improve outcomes, self-monitoring" and self-treatment           | Yes | No | No  |        | Yes |
| Schnall, R (2014). USA <sup>187</sup>          | Immune disorders                 | RCT        | 42  | Internet            | 12 w | Symptom frequency and intensity, use of symptom management strategies, and engagement with health care providers           | Indirect | Decrease in symptom frequency and intensity                     | Yes | No | Yes | Usable | Yes |
| Sciamanna                                      | Brain,                           | RCT        | 53  | Internet            | 9 m  | Internet use,                                                                                                              | Indirect | Increase                                                        | Yes | 1  | Yes | Usable | Yes |

|                                             |                                           |        |     |                 |     |                                                                               |          |                                                                                                                                                          |     |    |     |        |     |
|---------------------------------------------|-------------------------------------------|--------|-----|-----------------|-----|-------------------------------------------------------------------------------|----------|----------------------------------------------------------------------------------------------------------------------------------------------------------|-----|----|-----|--------|-----|
| , CN<br>(2006).<br>USA <sup>186</sup>       | spinal<br>cord, and<br>nerve<br>disorders |        |     |                 |     | visit<br>satisfaction,<br>headache<br>disability,<br>patient<br>satisfaction  |          | use (5.5<br>vs. 4.3)                                                                                                                                     |     |    |     |        |     |
| Shaw, LH<br>(2002).<br>USA <sup>50</sup>    | Mental<br>health<br>disorder              | Cohort | 46  | Internet        | 2 m | Depression,<br>loneliness,<br>self-esteem,<br>and perceived<br>social support | Indirect | Significa<br>nt<br>decrease<br>in<br>loneliness<br>and<br>depressio<br>n, and<br>significan<br>t increase<br>in social<br>support<br>and self-<br>esteem | Yes | No | No  |        | Yes |
| Shrier, LA<br>(2014).<br>USA <sup>109</sup> | Mental<br>health<br>disorder              | RCT    | 27  | Mobile          | 3 m | Feasibility,<br>acceptability,<br>and efficacy                                | Indirect | Significa<br>nt<br>decrease<br>( <i>p</i> = .03)                                                                                                         | Yes | 4  | Yes | Usable | Yes |
| Simon, GE<br>(2011).<br>USA <sup>73</sup>   | Mental<br>health<br>disorders             | RCT    | 118 | Social<br>media | 3 w | Self-<br>management                                                           | Indirect | Significa<br>nt return<br>to the<br>program<br>after<br>registrati<br>on (71%<br>versus<br>44%,<br><i>p</i> = .005)<br>and to                            | Yes | 5  | No  |        | Yes |



|                                      |                         |                  |      |          |      |                                                              |          |                                                                                                                                                      |     |    |     |        |     |
|--------------------------------------|-------------------------|------------------|------|----------|------|--------------------------------------------------------------|----------|------------------------------------------------------------------------------------------------------------------------------------------------------|-----|----|-----|--------|-----|
| Sims, H (2012). UK <sup>165</sup>    | Mental health disorders | Cohort           | 1256 | Mobile   | 12 m | Attendance rate                                              | Direct   | continued using the program after three weeks (38% versus 9%, p<.001)<br>Significant increase in attendance rates at 2009 and 2010 vs. 2008 (p<.001) | Yes | No | No  |        | Yes |
| Smith, KE (2004). USA <sup>148</sup> | Hormonal disorders      | Quasi-experiment | 16   | Internet | 6 m  | HbA1c, BP, total cholesterol, lipoprotein, and triglycerides | Direct   | Significant reduction in HbA1c 3.15 %, improve in (SBP, DBP, total cholesterol, HDL, LDL, triglycerides)                                             | Yes | No | No  |        | Yes |
| Song, H                              | Women's                 | RCT              | 20   | Mobile   | 1 m  | Perceived                                                    | Indirect | Increased                                                                                                                                            | Yes | 4  | Yes | Usable | Yes |

|                                           |                                 |        |     |                    |      |                                                                         |                                                                                                 |                                                                                                                                                     |                                                                                                                                                                                 |    |    |  |     |
|-------------------------------------------|---------------------------------|--------|-----|--------------------|------|-------------------------------------------------------------------------|-------------------------------------------------------------------------------------------------|-----------------------------------------------------------------------------------------------------------------------------------------------------|---------------------------------------------------------------------------------------------------------------------------------------------------------------------------------|----|----|--|-----|
| (2013).<br>USA <sup>42</sup>              | health<br>issues                |        |     |                    |      |                                                                         | knowledge,<br>mental well-<br>being,<br>patient-<br>provider<br>communication, and<br>usability |                                                                                                                                                     | levels of<br>perceived<br>knowledge<br>and,<br>patient-<br>provider<br>communication,<br>significantly less<br>stress<br>and<br>depression, and<br>improved<br>mental<br>health |    |    |  |     |
| Španiel, F<br>(2008).<br>UK <sup>63</sup> | Mental<br>health<br>disorders   | Cohort | 45  | Telemon<br>itoring | 12 m | CGI and<br>current<br>medication<br>compliance;<br>program<br>adherence | Indirect                                                                                        | 60%<br>decrease<br>in the<br>hospitaliz<br>ations;<br>increased<br>medicatio<br>n<br>complianc<br>e;<br>increase<br>adherenc<br>e to the<br>program | Yes                                                                                                                                                                             | No | No |  | Yes |
| Stacy, JN<br>(2009).<br>USA <sup>66</sup> | Heart<br>and<br>blood<br>vessel | RCT    | 497 | Mobile             | 6 m  | Medication<br>adherence                                                 | Indirect                                                                                        | Adherenc<br>e rate<br>70.4% vs<br>60.7%                                                                                                             | Yes                                                                                                                                                                             | 4  | No |  | Yes |

disorders

|                                           |                                       |     |      |          |      |                                                                      |          |                                                                                                                                                         |     |    |     |        |     |
|-------------------------------------------|---------------------------------------|-----|------|----------|------|----------------------------------------------------------------------|----------|---------------------------------------------------------------------------------------------------------------------------------------------------------|-----|----|-----|--------|-----|
| Steele, R (2007). Australia <sup>41</sup> | NS                                    | RCT | 192  | Internet | 3 m  | Satisfaction, acceptability, and usability                           | Indirect | Not-significant                                                                                                                                         | No  | 4  | Yes | Usable | No  |
| Steinberg, DM (2014). USA <sup>130</sup>  | Disorders of nutrition and metabolism | RCT | 185  | Internet | 12 m | Self-monitoring, determinants of adherence, and anthropometrics data | Direct   | Significantly weight loss (r = -.22; P=.04), and body mass index (P=.009)                                                                               | Yes | 4  | No  |        | Yes |
| Stockwell, MS (2012). USA <sup>166</sup>  | Health hazard                         | RCT | 9213 | Mobile   | 12 m | Receipt of an influenza vaccine                                      | Direct   | At the fall 27.1% (n=1026) vs 22.8% (n=864) received the influenza vaccine (difference, 4.3% [95% CI, 2.3%-6.3%]; RRR, 1.19 [95% CI, 1.10-1.28]; p.001) | Yes | No | No  |        | Yes |

|                                                   |                                       |            |      |                |      |                                                                             |          |                                                                          |     |    |     |        |     |
|---------------------------------------------------|---------------------------------------|------------|------|----------------|------|-----------------------------------------------------------------------------|----------|--------------------------------------------------------------------------|-----|----|-----|--------|-----|
| Strecher, VJ (2008). USA <sup>136</sup>           | Health hazard                         | RCT        | 1866 | Internet       | 6 m  | Engagement, tailoring depth, perceived message relevance, abstinence        | Indirect | Significant improvement in overall                                       | Yes | 4  | No  |        | Yes |
| Sugawara, Y (2012). Japan <sup>34</sup>           | Cancer                                | Case study | 51   | Social network | 1 w  | Relationships between the user and followers                                | Indirect | Treatment discussions, and psychological support                         | Yes | No | Yes | Usable | Yes |
| Tasker, AP (2007). UK <sup>149</sup>              | Hormonal disorders                    | RCT        | 37   | Mobile         | 12 m | Frequency of hypoglycemia                                                   | Direct   | 65% dairy vs. 89% CBI vs. 95% for SMS                                    | Yes | No | No  |        | Yes |
| Tate, DF (2006). USA <sup>124</sup>               | Disorders of nutrition and metabolism | RCT        | 192  | Internet       | 6 m  | BW, physical activity, and dietary intake                                   | Direct   | Effective                                                                | Yes | 4  | No  |        | Yes |
| ter Huurne, ED (2013). Netherlands <sup>183</sup> | Mental health disorder                | RCT        | 165  | Internet       | 6 m  | BMI, body dissatisfaction, quality of life, and physical and mental health. | Direct   | Significant improvements in eating disorder p<.001, Body dissatisfaction | Yes | 4  | No  |        | No  |

|                                              |              |                   |      |                    |     |                                                                                                                                                                         |          |                                                                                                                                                                                                                              |     |    |     |        |    |
|----------------------------------------------|--------------|-------------------|------|--------------------|-----|-------------------------------------------------------------------------------------------------------------------------------------------------------------------------|----------|------------------------------------------------------------------------------------------------------------------------------------------------------------------------------------------------------------------------------|-----|----|-----|--------|----|
|                                              |              |                   |      |                    |     |                                                                                                                                                                         |          | ction,<br>quality of<br>life, and<br>physical<br>and<br>mental<br>health,<br>BMI,<br>eating<br>disorder<br>psycho-<br>pathology                                                                                              |     |    |     |        |    |
| Thackeray,<br>R (2013).<br>USA <sup>46</sup> | NS           | Cross-<br>section | 1745 | Social<br>network  | NS  | Health-<br>related<br>activities,<br>consulting,<br>online<br>rankings,<br>reviews of<br>doctors,<br>hospitals,<br>medical<br>facilities, and<br>medical<br>treatments. | Indirect | Not-<br>significan<br>t:<br>consultati<br>on or<br>reviews<br>(41.15%),<br>used for<br>health<br>(31.58%),<br>posted<br>reviews<br>(9.91%),<br>and<br>posted a<br>comment,<br>question,<br>or<br>informati<br>on<br>(15.19%) | No  | No | Yes | Usable | No |
| Tildesley,<br>HD (2010).                     | Hormon<br>al | RCT               | 50   | Telemon<br>itoring | 6 m | Blood glucose<br>level                                                                                                                                                  | Direct   | HbA1c<br>dropped                                                                                                                                                                                                             | Yes | No | No  |        | No |

|                                             |                                         |               |      |          |     |                                                                      |          |                                                                                                                                           |     |   |     |        |     |
|---------------------------------------------|-----------------------------------------|---------------|------|----------|-----|----------------------------------------------------------------------|----------|-------------------------------------------------------------------------------------------------------------------------------------------|-----|---|-----|--------|-----|
| Canada <sup>37</sup>                        | disorders                               |               |      |          |     |                                                                      |          | from 8.8 to 7.6% (p 0.001) vs. 8.5 to 8.4% (p 0.51)                                                                                       |     |   |     |        |     |
| Tran, BX (2012). Vietnam <sup>108</sup>     | Immune disorders                        | Cross-section | 1016 | Mobile   | 3 m | Usability, adherence support                                         | Indirect | 78.6% found it effective for adherence aid, 63.5% usability, counseling 43.1%, 29.1% reminder, 31.3% message, 16.5% booking clinic visits | Yes | - | Yes | Usable | Yes |
| Trautmann, E (2008). Germany <sup>184</sup> | Brain, spinal cord, and nerve disorders | RCT           | 18   | Internet | 6 m | Frequency, duration, and intensity of headache, pain catastrophizing | Indirect | Significant pre- to post-treatment decreases for headache, pain catastrophizing                                                           | Yes | 4 | No  |        | Yes |

|                                                     |                                       |                  |     |          |      |                                                                                                                                                            |          |                                                                                                |     |   |     |        |     |
|-----------------------------------------------------|---------------------------------------|------------------|-----|----------|------|------------------------------------------------------------------------------------------------------------------------------------------------------------|----------|------------------------------------------------------------------------------------------------|-----|---|-----|--------|-----|
| Turner-McGrievy, GM (2014). USA <sup>131</sup>      | Disorders of nutrition and metabolism | RCT              | 137 | Mobile   | 3 m  | Body weight                                                                                                                                                | Indirect | Significant weight loss (p < 0.01)                                                             | Yes | 4 | No  |        | No  |
| Urowitz, S (2012). Canada <sup>103</sup>            | Hormonal disorders                    | Cohort           | 854 | Internet | 6 m  | Disease awareness, access to information, self-efficacy and behavior change, usability and discoverability, appropriateness, patient-provider relationship | Indirect | Increased patient access to information and engagement in their health care                    | Yes | 4 | Yes | Usable | Yes |
| van den Berg, MH (2007). Netherlands <sup>104</sup> | Bone, joint, and muscle disorders     | RCT              | 82  | Internet | 13 m | Physical activity, engagement, and satisfaction                                                                                                            | Indirect | Improve satisfaction, usability, physical activity, 85% group meetings, and 32% website layout | Yes | 4 | Yes | Usable | Yes |
| van der Vaart, R (2014).                            | Bone, joint, and                      | Quasi-experiment | 360 | Internet | 6 m  | Satisfaction with care, trust in the                                                                                                                       | Indirect | 44% involved in their                                                                          | Yes | 4 | Yes | Usable | Yes |

|                                          |                                  |                  |      |                |      |  |                                                                                                               |          |                                                                                              |     |    |     |        |     |
|------------------------------------------|----------------------------------|------------------|------|----------------|------|--|---------------------------------------------------------------------------------------------------------------|----------|----------------------------------------------------------------------------------------------|-----|----|-----|--------|-----|
| Netherlands <sup>174</sup>               | muscle disorders                 |                  |      |                |      |  | rheumatologist, self-efficacy in patient-provider communication, illness perception, and medication adherence |          | treatment and 37% had more knowledge about treatment                                         |     |    |     |        |     |
| Vilella, A (2004). Spain <sup>173</sup>  | Health hazard                    | RCT              | 4043 | Mobile         | 4 m  |  | Compliance rate to vaccine                                                                                    | Direct   | 77.2 vs. 80.7% vs. 88.4%, p < 0.05                                                           | Yes | No | No  |        | Yes |
| Villegas, N (2014). Chile <sup>105</sup> | Immune disorders                 | Quasi-experiment | 40   | Internet       | 1 m  |  | Feasibility, acceptability, and recommendations for improvements                                              | Indirect | Significant                                                                                  | Yes | 4  | Yes | Usable | Yes |
| Wakefield, BJ (2008). USA <sup>47</sup>  | Heart and blood vessel disorders | RCT              | 148  | Telemonitoring | 39 m |  | Readmission rates, urgent care clinic visits, survival, and quality of life                                   | Indirect | Not-significant on readmission rates or mortality; no differences in hospital days or urgent | No  | No | No  |        | No  |



|                                           |                                       |        |      |          |      |                                                                         |        |                                                                                                                |     |    |     |            |     |
|-------------------------------------------|---------------------------------------|--------|------|----------|------|-------------------------------------------------------------------------|--------|----------------------------------------------------------------------------------------------------------------|-----|----|-----|------------|-----|
| Ware, LJ (2008). UK <sup>132</sup>        | Disorders of nutrition and metabolism | Cohort | 265  | Internet | 3 m  | Physical activity, weight                                               | Direct | care<br>Significant reduction in weight (-2.6 kg, SD 3.2, p<.001), improve engagement                          | Yes | 3  | No  |            | Yes |
| Weppner, WG (2010). USA <sup>150</sup>    | Hormonal disorders                    | Cohort | 6185 | Internet | 48 m | Insulin use, morbidity, treatment were evaluated for impact on outcomes | Direct | Effective for non-visit-based health care for older individuals with diabetes                                  | Yes | No | No  |            | Yes |
| Williamson, DA (2006). USA <sup>194</sup> | Disorders of nutrition and metabolism | RCT    | 57   | Internet | 24 m | BMI, body weight, body composition, and weight loss behaviors           | Direct | Not-significant: fat for adolescents (0.08-0.71% vs. 0.84-0.72% BF) and weight for parents (1.1-0.91 vs. 0.60- | No  | 2  | Yes | Not usable | No  |

|                                               |                                       |                  |     |                |      |                                            |          |                                                                                                    |     |    |     |            |     |
|-----------------------------------------------|---------------------------------------|------------------|-----|----------------|------|--------------------------------------------|----------|----------------------------------------------------------------------------------------------------|-----|----|-----|------------|-----|
|                                               |                                       |                  |     |                |      |                                            |          | 0.89 kg)                                                                                           |     |    |     |            |     |
| Winstead-Derlega, C (2012). USA <sup>35</sup> | Immune disorders                      | Quasi-experiment | 650 | Social network | 4 m  | Acceptability, satisfaction                | Indirect | No marked changes in participant perceptions related to engaging in care or HIV disclosure         | No  | No | Yes | Usable     | No  |
| Winzelberg, AJ (2000). USA <sup>106</sup>     | Disorders of nutrition and metabolism | RCT              | 60  | Internet       | 3 m  | Body image and disordered eating attitudes | Direct   | Significant improvement in body image, feasibility and effectiveness of providing health education | Yes | 3  | Yes | Usable     | Yes |
| Womble, LG (2004). USA <sup>193</sup>         | Disorders of nutrition and metabolism | RCT              | 47  | Internet       | 12 m | Body weight                                | Direct   | Not-significant for BW                                                                             | No  | No | Yes | Not usable | No  |
| Yoon, KH                                      | Hormon                                | RCT              | 51  | Mobile         | 12 m | HbA1c, FPG,                                | Direct   | HbA1c                                                                                              | Yes | No | No  |            | Yes |

(2008). al  
Korea<sup>151</sup> disorders

2HPMG

was 0.81  
vs. -1.32,  
p<0.05;  
FPG was  
27.7 vs.  
-10.7, NS;  
2HPMG  
was 18.1  
vs. -100, p  
< 0.05

NS=not specified, BMI=body mass index, BW=body weight, WC=waist circumference, RCT=randomized controlled trial, HbA1c= Glycated hemoglobin, vs=versus, P=P-value, CI=confidence interval, OR=odd ratio, EF=effect size, SMS= short message service, %=percentage, BP=blood pressure, DBP=diastolic blood pressure, SBP= systolic blood pressure, FBG= fasting blood glucose, 2HFBG= 2 hours fasting blood glucose, TG=triglyceride, HDL= high density lipoprotein, HR=heart rate, [a]1=Biomedical theory (chronic model), 2=Behavioral learning theory, 3=Communication (social support theory), 4=Cognitive theory (TPB, SOC, TTM, self-efficacy, information motivation, and behavioral skill, 5= Self-regulatory, [b]yes= positive impact, and no= no impact, [c]yes=improve ingagement, and no=does not improve engagement.
